# Supplementary material for: How does the public conceptualise the quality of care and its measurement in community pharmacies in the UK: a qualitative interview study
Source: PubMed Central journal article supplement — BMJ Open. 2019 Mar 30;9(3):e027198. doi: 10.1136/bmjopen-2018-027198 (PMC6475360; doi:10.1136/bmjopen-2018-027198), 2019-03-30
Supplement: bmjopen-2018-027198.draft_revisions.pdf [file bmjopen-2018-027198.draft_revisions.pdf]

# BMJ Open

BMJ Open is committed to open peer review. As part of this commitment we make the peer review history of every article we publish publicly available.

When an article is published we post the peer reviewers' comments and the authors' responses online. We also post the versions of the paper that were used during peer review. These are the versions that the peer review comments apply to.

The versions of the paper that follow are the versions that were submitted during the peer review process. They are not the versions of record or the final published versions. They should not be cited or distributed as the published version of this manuscript.

BMJ Open is an open access journal and the full, final, typeset and author-corrected version of record of the manuscript is available on our site with no access controls, subscription charges or pay-per-view fees (<http://bmjopen.bmj.com>).

If you have any questions on BMJ Open's open peer review process please email [info.bmjopen@bmj.com](mailto:info.bmjopen@bmj.com)

# BMJ Open

## Person-centeredness, Professionalism and Privacy: How does the public conceptualise the quality of care and its measurement in community pharmacies in the United Kingdom?

|                               |                                                                                                                                                                                                                                                |
|-------------------------------|------------------------------------------------------------------------------------------------------------------------------------------------------------------------------------------------------------------------------------------------|
| Journal:                      | <i>BMJ Open</i>                                                                                                                                                                                                                                |
| Manuscript ID                 | bmjopen-2018-027198                                                                                                                                                                                                                            |
| Article Type:                 | Research                                                                                                                                                                                                                                       |
| Date Submitted by the Author: | 12-Oct-2018                                                                                                                                                                                                                                    |
| Complete List of Authors:     | Watson, Margaret; University of Bath, Department of Pharmacy and Pharmacology<br>Silver, Karin; University of Bath, Department of Pharmacy and Pharmacology<br>Watkins, Ross; University of Bristol Medical School, Population Health Sciences |
| Keywords:                     | Quality in health care < HEALTH SERVICES ADMINISTRATION & MANAGEMENT, Organisation of health services < HEALTH SERVICES ADMINISTRATION & MANAGEMENT, PUBLIC HEALTH, QUALITATIVE RESEARCH                                                       |
|                               |                                                                                                                                                                                                                                                |

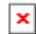

1  
2  
3 Person-centeredness, Professionalism and Privacy: How does the public conceptualise the quality  
4 of care and its measurement in community pharmacies in the United Kingdom?  
5  
6  
7  
8  
9

10 <sup>1</sup>Watson M\*, <sup>1</sup>Silver K, <sup>2</sup>Watkins R.  
11  
12  
13

14 <sup>1</sup>Department of Pharmacy and Pharmacology, University of Bath  
15

16 <sup>2</sup>School of Social and Community Medicine, University of Bristol  
17  
18

19 \*Corresponding author  
20

21 Professor Margaret C Watson  
22

23 Department of Pharmacy and Pharmacology, University of Bath, Bath, England, BA2 7AY.  
24

25 Email: [m.c.watson@bath.ac.uk](mailto:m.c.watson@bath.ac.uk) Telephone: 01225 386787  
26  
27  
28

29 Ms Karin Silver  
30

31 Department of Pharmacy and Pharmacology, University of Bath, Bath, England, BA2 7AY.  
32

33 Dr Ross Watkins  
34

35 School of Social and Community Medicine, University of Bristol, Bristol, England, BS8 2PS.  
36  
37  
38  
39

40 Keywords:  
41

42 Community pharmacy services; Quality of Health Care; Quality Improvement; Qualitative  
43 Research  
44  
45  
46  
47  
48  
49  
50  
51  
52  
53  
54  
55  
56  
57  
58  
59  
60

## ABSTRACT

### Objectives

This study explored citizens' perspectives about the quality of community pharmacy services in the United Kingdom (UK) and whether and how quality of community pharmacy services should be measured.

### Design

Semi-structured interviews and focus groups were conducted and were audio-recorded, transcribed and analysed systematically using an interpretive approach.

### Participants

Members of the public

Setting: Scotland, England and Wales.

### Results

Data were collected from 20 participants: 11 interviews and two focus groups (in community settings, with five and four participants).

Quality was conceptualised as multi-dimensional with inter-related overarching themes of person-centeredness, professionalism and privacy. The importance of relational aspects with pharmacy personnel was emphasised including the need for a "friendly" caring service, continuity of care, being known to personnel, including their awareness of individual's health conditions: *"it's quite a personal service I would say...I think it means that they care about your welfare"*.

Participants discussed the importance of a professional approach in customer interactions including staff behaviour and appearance. Pharmacy design influenced perceptions of privacy, including having sufficient space or a separate consultation room to promote confidential

1  
2  
3 consultations with a pharmacist. Participants suggested that quality assurance is needed to  
4  
5 improve quality and to inspire confidence in the public “*it would drive up quality standards*  
6  
7 *overall*” but suggested that quality ratings were unlikely to influence their use of specific  
8  
9 pharmacies. They emphasised the need for multi-dimensional quality ratings and for  
10  
11 transparency with their derivation.  
12  
13  
14  
15

## 16 17 18 Conclusions

19  
20 The public conceptualise quality of community pharmacy services as multidimensional and value  
21  
22 relational aspects of care provided by personnel in this setting. Whilst the development and  
23  
24 application of quality indicators may drive improvement, it seems unlikely to influence the  
25  
26 public’s use of individual pharmacies.  
27  
28  
29  
30  
31

## 32 33 Article Summary

34 Strengths and Limitations – 5 bullets re methods, not results

- 35  
36 • a diverse range of individuals participated in terms of age, gender, and country but not  
37  
38 ethnicity
- 39  
40 • data collection was undertaken by one experienced health service researcher who was  
41  
42 also a pharmacist
- 43  
44 • data analysis was undertaken by two experienced qualitative researchers neither of  
45  
46 whom were pharmacists. This ensured a balanced approach to the analysis and  
47  
48 interpretation of the data.  
49  
50  
51  
52  
53  
54  
55  
56  
57  
58  
59  
60

- all key recurring themes were identified with no new themes emerging in later interviews or focus groups.

## INTRODUCTION

Each year in the United Kingdom (UK), an estimated 650,000 emergency department (ED) consultations and 18 million general practitioner (GP) consultations are for conditions (hereafter referred to as self care consultations) that can be treated effectively by community pharmacy personnel, equating to around £1.1 billion in resources.[1, 2] In England, each of the 11699 community pharmacies [3] serves an average population of around 5600 citizens [4] of whom an estimated 89% are within 20 minutes' walk of a community pharmacy.[5] National policies and resources recommend the public to seek care from the most 'appropriate' provider.[6,7,8] Reassurance is needed regarding the quality of care provided in this setting in general, and more specifically for self care, which has been shown to vary depending upon the criteria used.[9,10,11] Whilst national quality indicators for community pharmacy were introduced in England in 2017 [12], none refer to the management of self care consultations despite this service being regarded the "shop window" of community pharmacy.[13] As such, the study presented here is part of a research programme to co-produce quality indicators for self care consultations.

The aim of this study was to conceptualise public perceptions and beliefs about the:

- quality of community pharmacy services in general
- management of self care consultations
- measurement of the quality of community pharmacy services

## **METHODS**

### **Study Design**

Interviews and focus groups were conducted with members of the public with the method used varying according to participant availability and preference.

### **Recruitment, sampling and consent**

Participants were recruited through existing research networks such as Health and Social Care Alliance Scotland,[14] as well as community groups and personal networks. Individuals were eligible to participate if they used community pharmacy services, and understood and were able to communicate in English. An email was sent to potential participants with information about the study, advising them to contact the research team if they wished to participate. Recruitment ceased once theoretical saturation was reached (i.e. when no new themes were emerging from the data). A maximum variation sample was recruited using a combination of purposive, convenience, and snowballing techniques.[15]

### **Data Collection**

One female researcher (MW), who is a registered pharmacist with over 20 years' experience of health services research, undertook all data collection. The interviews and focus groups were

1  
2  
3 face-to-face or by telephone, audio-recorded and were conducted between August 2016 and July  
4  
5 2017, and lasted an average of 51 minutes (range 31 to 74 minutes). No other individuals were  
6  
7 present during the interviews or focus groups. The topic guide was informed by existing work  
8  
9 on quality and quality improvement, as well as a precedent interview study involving  
10  
11 pharmacists.[13] It was not piloted prior to use but was modified throughout the data collection  
12  
13 process to incorporate relevant topics identified in earlier interviews and focus groups. The  
14  
15 concepts of “what matters to you”, “always events” and “never events” were included.[13,16]  
16  
17 Always events are “aspects of the patient experience that are so important to patients and  
18  
19 families that health care providers must aim to perform them consistently and reliably for every  
20  
21 patient, every time”.[17]  
22  
23  
24  
25  
26  
27  
28  
29

30 Quality measurement was explored in general terms and more specifically in relation to the use  
31  
32 of rating or accreditation systems. The same topic guide was used for interviews and focus  
33  
34 groups. As new issues or themes emerged, they were included in subsequent interviews/focus  
35  
36 groups. All participants provided written consent to participate. On completion of the  
37  
38 interviews/focus groups, participants were offered a ‘thank you’ voucher worth £20.  
39  
40  
41  
42  
43  
44

#### 45 **Data Analysis**

46  
47 Audio-recordings were transcribed verbatim by an experienced transcriber and accuracy checked  
48  
49 (KS/RW). The data were analysed systematically using Thematic Analysis.[18,19] The focus of the  
50  
51 analysis was to organise the data in a meaningful way according to the *a priori* aims of the study,  
52  
53 as well as to allow for the identification of topics and issues of importance to participants. NVivo  
54  
55  
56  
57



1  
2  
3 11 (QSR International) was used to help organise, code and explore the data. Two researchers  
4  
5 (KS, RW) first familiarised themselves with the transcripts and coded to broad topic areas  
6  
7 (structuring codes). The next (extensive and iterative) phase involved the identification of themes  
8  
9 and sub-themes to reflect the research questions (a priori codes/nodes) and from within the data  
10  
11 itself (in vivo codes/nodes). As the analysis progressed, conceptual and crosscutting themes  
12  
13 were identified and coded, in addition to relevant topic codes.  
14  
15

16  
17 Each transcript was coded by one researcher (KS or RW), with most coded by two researchers  
18  
19 (KS, RW) to ensure reliability. The themes, their names and explanations were continually refined  
20  
21 through discussion between the researchers to ensure that they were distinct from other  
22  
23 themes, internally coherent and consistently applied. The coded data were explored through  
24  
25 queries and other NVivo tools, and themes were mapped to identify connections. Once coding  
26  
27 was complete, a Framework approach [20] was used to support the systematic analysis of data  
28  
29 around the research questions, to enable an assessment of prevalence and coverage of key  
30  
31 themes (i.e. dimensions of quality). Further interpretation and discussion, to ensure that  
32  
33 analytical claims were congruent with the extracts, culminated in the creation of a thematic  
34  
35 resource document. This reported all the relevant coded data under overarching  
36  
37 themes/headings, with some extracts being duplicated under two or more themes (e.g. in the  
38  
39 case of richness or complexity). This study is reported in accordance with COREQ [21].  
40  
41  
42  
43  
44  
45  
46  
47  
48  
49

### 50 **Consent and Ethical Review**

51  
52 The University of Aberdeen College Ethics Review Board provided ethical review and approval for  
53  
54 the study (CERB/2015/6/1208).  
55  
56  
57

1  
2  
3  
4  
5  
6  
7  
8  
9  
10  
11  
12  
13  
14  
15  
16  
17  
18  
19  
20  
21  
22  
23  
24  
25  
26  
27  
28  
29  
30  
31  
32  
33  
34  
35  
36  
37  
38  
39  
40  
41  
42  
43  
44  
45  
46  
47  
48  
49  
50  
51  
52  
53  
54  
55  
56  
57  
58  
59  
60

For peer review only

## RESULTS

In total, 20 individuals participated (Scotland (n=7) all interviewed individually; England (one focus group (n=4) and four individual interviews (one of which was face-to-face)); and Wales (one focus group (n=5)) (Table 1). The majority were British and female. Four participants had been employed previously in health-related employment (none reported pharmacy-related employment although one male sometimes worked as a delivery driver for a local pharmacy). The focus group in England comprised four women in their 30s, all parents of young children. The focus group in Wales comprised three women in their 40s and 50s who were all mothers, and two graduate students in their 20s. All seven participants in Scotland were recruited through the Scottish Patient Alliance, two participants in England were recruited through patient and public involvement (PPI) groups, and the English and Welsh focus group participants were recruited through professional contacts of the researchers (MW, RW).

Table 1 Participant characteristics

| Identifier | Country  | Ethnicity      | M/F | Range | Healthcare background |
|------------|----------|----------------|-----|-------|-----------------------|
| I1         | Scotland | White Scottish | F   | 50-59 | NS                    |
| I2         | Scotland | Irish          | F   | 60-69 | Yes (retired)         |
| I3         | Scotland | White Scottish | F   | 40-49 | NS                    |
| I4         | Scotland | White Scottish | F   | 20-29 | No                    |
| I5         | Scotland | White British  | F   | 50-59 | NS                    |
| I6         | Scotland | White          | M   | 70-79 | No                    |
| I7         | Scotland | British        | M   | 70-79 | Yes                   |
| I8         | England  | White British  | F   | 70-79 | Yes                   |
| I9         | England  | White British  | M   | 60-69 | No                    |
| I10        | England  | British        | M   | 70-79 | No                    |
| I11        | England  | White          | F   | 50-59 | No                    |
| F1_1       | England  | British        | F   | 30-39 | No                    |
| F1_2       | England  | British        | F   | 30-39 | No                    |
| F1_3       | England  | White British  | F   | 30-39 | No                    |
| F1_4       | England  | British        | F   | 30-39 | No                    |
| F2_1       | Wales    | British        | F   | 50-59 | No                    |
| F2_2       | Wales    | White European | F   | 20-29 | No                    |
| F2_3       | Wales    | White British  | M   | 20-29 | No                    |
| F2_4       | Wales    | NS             | F   | 40-49 | No                    |
| F2_5       | Wales    | White British  | F   | 40-49 | Yes                   |

I Interview F Focus Group NS Not stated

### Dimensions of Quality: The three P's.

When asked “*what matters to you*”, participants’ conceptualised the quality of community pharmacies as multi-dimensional and inter-related with three over-arching themes: person-centeredness; professionalism; and privacy. Selected quotes are presented to illustrate these dimensions and themes (Identifiers I and F denote interview and focus group participants, respectively).

1  
2  
3 Person-centeredness  
4

5 Participants emphasised the importance of relational aspects with pharmacy personnel including  
6 the need for a “friendly” caring service, continuity of care, and the staff ‘knowing’, the individual,  
7 including awareness of their health conditions.  
8  
9  
10  
11  
12  
13

14 *14: The staff are really friendly, and helpful, ... ., it's quite a personal service I would say...I  
15 think it means that they care about your welfare.*  
16  
17  
18

19  
20  
21  
22 *18: I like continuity... It makes me feel safer, and um...it's like your doctor, you want your  
23 doctor to know you.. it's nice to think that this person knows you and might actually take  
24 an interest in you as opposed to you're just the next customer.*  
25  
26  
27  
28  
29  
30  
31

32 They generally wanted easy access to a pharmacist and pharmacies in terms of geographical  
33 proximity and location, as well as opening hours which suited their needs and lifestyle, and  
34 suitable parking or access by public transport. However, others were willing to travel further for  
35 specific medication needs, or a better service.  
36  
37  
38  
39  
40  
41  
42  
43  
44

45 Some also wanted to the pharmacist to be visible and accessible in the pharmacy.  
46  
47  
48  
49

50 *19: ..direct access, easy access to the pharmacist (...) because there are some pharmacists  
51 [sic] you go to where the registered pharmacists is like someone hiding behind...a curtain  
52 and you don't see them.*  
53  
54  
55  
56  
57  
58  
59  
60

1  
2  
3  
4  
5  
6 *F1\_1: They [counter staff] are the gatekeepers aren't they? ..the pharmacist is in the back,*  
7  
8 *somewhere you know? It does feel like you have to have something really legitimate to*  
9  
10 *speak to them rather than them being available to speak to you (...). I don't know the*  
11  
12 *rules.. I would like to know the answer to that – when am I entitled to speak to the*  
13  
14 *pharmacist?*  
15  
16  
17  
18  
19

20 Interviewees felt that staff should take time to listen and communicate clearly, involve people in  
21 decisions around their own treatment, be responsive to personal requirements and preferences,  
22 and be respectful of individual concerns.  
23  
24  
25  
26  
27  
28  
29

30 *I10: [there should always be] a feeling that the person you are talking to has time for you*  
31  
32 *obviously. If you have the feeling that you are being a nuisance then you would be*  
33  
34 *reluctant to ask a second time.*  
35  
36  
37  
38  
39

#### 40 Professionalism

41  
42 Participants discussed the importance of a professional approach in customer interactions  
43 including staff behaviour and appearance. Although not all expected staff to wear a uniform, it  
44 was commonly felt that they should be identifiable, for example, by wearing name badges.  
45  
46  
47  
48  
49

50  
51 *I11: The staff would look clean and smart and presentable and the name badge confirming*  
52  
53 *that they are not just Saturday girls, they are kind of trained professionals.*  
54  
55  
56  
57

1  
2  
3  
4  
5  
6 *F1\_2: I guess maybe for them to tell you who they are - introduce themselves. 'I am a*  
7  
8 *pharmacist' or - so that you know exactly who you're dealing with.*  
9

10 People expected staff (including, but not only, pharmacists) to be competent, suitably trained,  
11  
12 qualified and confident in their ability to diagnose, advise and prescribe, and for all staff to be  
13  
14 knowledgeable about over-the-counter (OTC) medication (i.e. medicines which can be  
15  
16 sold/bought without the need for a prescription), and be able to provide (cheaper) alternatives.  
17  
18  
19  
20  
21

22  
23 *F2\_3: If they are still uncertain they should always refer you back to your GP .*  
24  
25

26  
27  
28 *F1\_3: I don't know if it was the pharmacist or the pharmacy assistant to be honest but*  
29  
30 *she basically advised me to take a slightly cheaper model of the medicine... .. And I really*  
31  
32 *appreciated it, that's a nice thing to do.*  
33  
34

35  
36  
37 Counter staff were expected defer to the pharmacist if necessary, who should then refer onward  
38  
39 as appropriate, but not be overly risk averse (a frustration for parents of young children).  
40  
41  
42

43  
44  
45 *F1\_2: [I] went a few times when [name of child] was younger and then because I just kept*  
46  
47 *getting... 'I don't know what's wrong with him, he's got like a bit of a rash, or something,*  
48  
49 *is there anything you can give me?' and they were like 'oh we wouldn't like to say just go*  
50  
51 *and see the GP'. Now .. I will go straight to the GP ..because ..they don't ever seem keen*  
52  
53 *to actually sort of [sic] not diagnose.*  
54  
55  
56  
57

1  
2  
3  
4  
5  
6 Participants felt it was important that a pharmacy felt clean, light and “hygienic”. It was felt that  
7  
8 a good quality pharmacy should have sufficient stock so that prescriptions could be fully filled, in  
9  
10 a timely manner, to avoid return visits.  
11  
12  
13  
14

15 *I6: it's got to be how quickly you receive whatever medicine or treatment you need ...*  
16  
17 *that's the most important thing.*  
18  
19  
20  
21  
22

### 23 Privacy

24  
25 Privacy was an important consideration, and included physical characteristics of the pharmacy in  
26  
27 supporting privacy, with either a separate consultation room or a dedicated private area, and the  
28  
29 need to have confidential conversations with the pharmacist.  
30  
31  
32  
33  
34

35 *I2: private consultation room that's accessible. Not at the back of the shop (...) I don't*  
36  
37 *think there should be over the counter consultations at the same section where people are*  
38  
39 *coming to buy their cosmetics or whatever or pick up their prescriptions.. it should be*  
40  
41 *separate, in fact go into [supermarket pharmacy] you've got to queue up with everybody*  
42  
43 *that's wanting their fags, or wants a lottery ticket.*  
44  
45  
46  
47  
48  
49

50 Privacy was interwoven with confidentiality, which in turn, influenced confidence and trust in  
51  
52 pharmacy personnel.  
53  
54  
55  
56  
57  
58  
59  
60



1  
2  
3 *I11: ..they reassure you ..(.)..you that it is a private consultation maybe and that your data*  
4 *is protected as a minimum I suppose.*  
5  
6  
7  
8  
9

10 *I5: We do have a village pharmacy, but because of the lack of confidentiality I am now*  
11 *taking myself a 52 mile round trip to get a prescription. ....() It matters that I feel confident*  
12 *in the service that I'm being given, that I'm confident in the fact that my information is*  
13 *being kept confidential, and that the fact is that the pharmacists on the whole genuinely*  
14 *are trying to do their best by patients.*  
15  
16  
17  
18  
19  
20  
21  
22  
23  
24

## 25 **Measuring Quality in Community Pharmacies**

26  
27 Participants were asked whether the quality of community pharmacies should be measured and  
28 if so, what measures to use. Participants suggested that quality assurance is needed to improve  
29 quality as well as to inspire confidence in the public.  
30  
31  
32  
33  
34  
35  
36

37 *I5: ..the only way you're going to know that you're going to get a good service is to actually*  
38 *publish the fact that you are getting a good service. It's like in hospital wards for*  
39 *cleanliness, now they're putting up figures showing that they've managed to eliminate for*  
40 *the last 100 days - they've had no MRSA - that gives confidence to patients when they*  
41 *read that and see these facts and figures. And they're put out there for everybody to see*  
42 *not just the few, that's important.(...) .it would be about saying to the good pharmacists*  
43 *'well done you're getting it right every time'. But it's also saying to the other ones 'you*  
44 *need to pull your socks up'.*  
45  
46  
47  
48  
49  
50  
51  
52  
53  
54  
55  
56  
57

1  
2  
3  
4  
5  
6 There was recognition that quality could be difficult to measure across varied services and  
7  
8 discussion of which criteria to use.  
9

10  
11  
12  
13 *F2\_4: How effective was the information or how accurate was the information you*  
14  
15 *received, did it work for you, was it right or was it wrong or, how satisfied were you on*  
16  
17 *what you were told, and I think that's it in a nutshell really.(...)*  
18  
19

20  
21  
22  
23 Suggested methods of quality measurement included: customer satisfaction surveys/instant  
24  
25 feedback; audit; mystery shoppers; and the use of professional standards. The use of rating  
26  
27 systems was explored specifically. Participants identified similar systems associated with other  
28  
29 aspects of life, including: shopping (Amazon); travel (Trip Advisor); restaurants (food hygiene  
30  
31 ratings); health (hospital wards); and education services (Ofsted (Office for Standards in  
32  
33 Education)). Many participants expressed broadly positive attitudes towards rating systems,  
34  
35 whilst others questioned their usefulness based upon the use of similar systems applied to other  
36  
37 areas e.g. education. The relevance of these systems to community pharmacies was also  
38  
39 questioned due to the more complex, less “transactional” element of service/customer  
40  
41 interaction.  
42  
43  
44  
45  
46  
47  
48  
49

50 *I9: There are ratings systems for things that - where a service can damage the public. ..()..*  
51  
52 *we already have food safety ratings for cafes and restaurants. One might ask why we*  
53  
54 *don't have one for something where the service could kill you more effectively, or more*  
55  
56  
57

1  
2  
3 *easily..(..).. you can tell a reasonable restaurant or cafe from your first consumer*  
4  
5 *experience, you won't necessarily know a really good pharmacy from a less than good*  
6  
7 *pharmacy.*  
8  
9

10  
11  
12  
13 Participants described potential positive, negative and unintended consequences of a star-type  
14  
15 rating system for reporting quality.  
16

17  
18 *I4: I think it would drive up quality standards overall. Yeah, I think it would be a good*  
19  
20 *measure. If chemists know that they're being rated they obviously wouldn't want a bad*  
21  
22 *rating.*  
23

24  
25  
26  
27  
28 *I8: .. I realise how frightened people are of their health...so I think if they went into a*  
29  
30 *chemist shop and saw that maybe it only had 3 and room for improvement, I think they'd*  
31  
32 *[the public] get nervous about that. So yes, there can be a rating but I don't think it really*  
33  
34 *needs to be displayed when it comes to health.*  
35  
36

37  
38  
39  
40 Some participants considered ratings systems to be too subjective.  
41

42  
43  
44  
45 *F2\_1: .. if it was general public rating then I'd be a bit sceptical but if it came from a*  
46  
47 *professional going in and give it an accredited, like the scores on the door, like it comes*  
48  
49 *from a governing body ... then I would have more tendency to go with what they said, ..*  
50  
51 *a non-biased organisation .. and you were judged (...) Maybe give it different categories,*  
52  
53 *maybe the customer service side ask the general public, but as far as the professional - the*  
54  
55  
56  
57

1  
2  
3 *accuracy of what was given out and the way everything was kept - leave that part to the*  
4  
5 *professionals because I wouldn't be anyone to judge.*  
6  
7  
8  
9

10 Most participants stated that they would take notice of star ratings if they existed but wouldn't  
11 necessarily base their choice of pharmacy upon them. Some preferred to make their own  
12 judgement. For most, the decision to use a particular pharmacy was contingent on a number of,  
13 potentially overlapping, factors including accessibility, personal needs, time available and  
14 perceived urgency. Given that most also expressed general satisfaction with the pharmacy they  
15 used, and some had no realistic choice of using another, there was some scepticism around the  
16 value of a star ratings type system in terms of what it might be based on and how it would be  
17 used.  
18  
19  
20  
21  
22  
23  
24  
25  
26  
27  
28  
29  
30  
31

32 *F2\_2: It wouldn't affect my choice of the pharmacy unless it was maybe a one star out of*  
33 *five then I'd be like well 'what's going on here like why' but if it was four or three I'd*  
34 *probably wouldn't care because I probably wouldn't understand what the rating is based*  
35 *on, who gave this rating to this particular pharmacy. I mean in restaurants I know that if*  
36 *the hygiene -so I can imagine what it means - but in a pharmacy, but is it the customer*  
37 *service, is it the way they organise their medicines, I'd probably just base my choice - based*  
38 *on my experience.*  
39  
40  
41  
42  
43  
44  
45  
46  
47  
48  
49  
50  
51

## 52 **DISCUSSION**

53  
54  
55  
56  
57

### Statement of Principal Findings

Quality was conceptualised as multi-dimensional with inter-related overarching themes of person-centeredness, professionalism and privacy. The importance of relational aspects with pharmacy personnel was emphasised. Participants valued a professional approach including staff behaviour and appearance. Pharmacy design influenced perceptions of privacy, including having sufficient space or a separate consultation room to promote private and confidential consultations with a pharmacist.

Participants suggested that quality assurance would “*drive up quality standards overall*” and inspire confidence in the public, but they intimated that quality ratings were unlikely to influence their use of specific pharmacies. They emphasised the need for multi-dimensional quality ratings and for transparency with their derivation.

### Strengths and Weaknesses

We included a diverse range of participants in terms of country, gender and age, but not ethnicity. We were satisfied that our sample size was appropriate in terms of answering our research questions relating to the conceptualisation of quality and its measurement.[22] One experienced health service researcher, who was also a pharmacist (MW), undertook all data collection. She did not disclose her pharmacist background unless specifically asked. The breadth and depth of topics covered suggests that participants felt empowered to participate and share positive and negative experiences of community pharmacy use. Data analysis was undertaken by two experienced qualitative researchers (KS, female and RW, male) neither of whom were

1  
2  
3 pharmacists. This ensured a balanced approach to the analysis and interpretation of the data.  
4  
5 Our interpretive analysis explored participants' understanding and sense-making of their  
6  
7 experiences of pharmacy services. We are confident that all key recurring themes were identified  
8  
9 with no new themes emerging in the later interviews or focus groups.  
10  
11  
12  
13  
14

### 15 **Important Differences in the results**

16  
17 None of the major themes derived from our study are reflected in the national quality indicators.  
18  
19 This is perhaps unsurprising given that there was no patient and public involvement (PPI) with  
20  
21 indicator development. To date, there has been minimal PPI in the development of the few  
22  
23 existing quality indicators for community pharmacy services.[23,24,25] There has, however,  
24  
25 been limited exploration of the likely influence of quality ratings on patient behaviour. Our  
26  
27 participants anticipated that quality indicators would have little effect on their use of pharmacies,  
28  
29 reflecting the results of two US studies that concurred that patients would only consider  
30  
31 indicators if they were seeking a community pharmacy in a new area[26,27].  
32  
33  
34  
35  
36  
37  
38  
39

### 40 **Meaning of the study**

41  
42 Our results show that the public value relational aspects of care i.e. personnel who are friendly  
43  
44 and approachable, and reflect a recent UK-wide survey of over 1000 members of the public and  
45  
46 their preferences for attributes of community pharmacies when seeking care for minor ailments  
47  
48 (aka self care consultations).[28] As with these survey respondents, our participants also  
49  
50 prioritised ease of access and convenience as important attributes.  
51  
52  
53  
54  
55  
56  
57

### **Implications for clinicians and policymakers; and unanswered questions and future research.**

Future quality indicators should involve stakeholders, particularly patients and public, as the main users of community pharmacy. Despite a possible lack of effect on care-seeking behaviour, the use of co-produced indicators *could* be used to drive quality improvement within and between community pharmacies.

### **CONCLUSION**

The public conceptualise quality of community pharmacy services as multidimensional and they value relational aspects of care provided by personnel in this setting. Whilst the development and application of quality indicators may drive improvement, it seems unlikely that they would influence the public's use of individual pharmacies.

### **ACKNOWLEDGEMENTS**

We thank all the members of the public who participated in interviews and focus groups as well as the organisations and individuals who facilitated recruitment of participants for this study.

### **FUNDING**

This work was supported by the Health Foundation with Professor Watson's Improvement Science Fellowship.

### **COMPETING INTERESTS**

None declared.

### **AUTHOR CONTRIBUTIONS**

1  
2  
3 MW led the scientific development and interpretation of the study, conducted most of the data  
4  
5 collection, and led manuscript production and revisions.  
6

7  
8 KS advised on and developed analytical tools and frameworks, and contributed towards data  
9  
10 analysis and interpretation, manuscript production and revisions.  
11

12  
13 RW contributed towards data analysis and interpretation, manuscript production and revisions.  
14

## 15 16 17 **DATA SHARING**

18  
19 No additional data are available. All data related to this study are included in this submission,  
20  
21 either in tables in the manuscript or in supplementary files.  
22  
23  
24  
25  
26  
27

## 28 29 **PATIENT AND PUBLIC INVOLVEMENT STATEMENT**

30  
31 We did not involve PPI representatives in the development of the research questions and outcome  
32  
33 measures or in the design of the study. However, patients and the public were recruited through: the  
34  
35 Scottish Patient Alliance; two participants in England were recruited through patient and public  
36  
37 involvement (PPI) groups; and the English and Welsh focus group participants were recruited through  
38  
39 professional contacts of the researchers. Study results will be disseminated to all participants who  
40  
41 expressed an interest in being informed of the results using a plain language summary that will be sent  
42  
43 via email or in the post. All participants were thanked in the acknowledgements.  
44  
45  
46  
47  
48  
49  
50  
51  
52  
53  
54  
55  
56  
57



## References

- 
- 1 Fielding S, Porteous T, Ferguson J, *et al*. The burden of minor ailment consultations in general practice and emergency departments. *Fam Pract* 2015;32:165-172. doi: 10.1093/fampra/cmz003
- 2 Watson MC, Ferguson J, Barton GR, *et al*. A comparison of health- and cost-related outcomes for patients presenting with similar symptoms in community pharmacies, general practices and emergency departments: A cohort study. *BMJ Open* 2015;5:e006261 doi:10.1136/bmjopen-2014-006261
- 3 NHS Digital (National Statistics). General Pharmaceutical Services in England 2007/2008 to 2016/2017 <https://digital.nhs.uk/data-and-information/publications/statistical/general-pharmaceutical-services/general-pharmaceutical-services-england-2007-08-to-2016-17#key-facts>. Accessed 23/07/18
- 4 Worldometer: UK Population (live). <http://www.worldometers.info/world-population/uk-population>. Accessed 23/07/18
- 5 Todd A, Copeland A, Husband A, *et al*. The positive pharmacy care law: an area-level analysis of the relationship between community pharmacy distribution, urbanity and social deprivation in England. *BMJ Open* 2014;4:e005764. doi:10.1136/bmjopen-2014-005764

1  
2  
3  
4  
5  
6  
7 6 NHS England. Transforming urgent and emergency care services in England. Urgent and  
8  
9 emergency care review end of phase 1 report. Appendix 1—Revised evidence base from the  
10  
11 urgent and emergency care review. The Urgent and Emergency Care Review. NHS, London; 2013.  
12  
13

14  
15  
16 7 NHS Choices: NHS services explained.

17  
18  
19 <https://www.nhs.uk/NHSEngland/AboutNHSservices/Pages/NHSServices.aspx>

20  
21 Accessed 23/07/18  
22  
23

24  
25  
26 8 NHS Scotland: Know who to turn to. <http://knowwhototurto.org> Accessed 23/07/18  
27  
28

29  
30  
31 9 Pearl J. Are some pharmacies failing? WHICH? 2013(June 2013):26  
32  
33

34  
35  
36 10 Studman A. Three in 10 pharmacies not following safety guidelines, finds Which?

37  
38 investigation. Which? 2018 (February): [https://www.which.co.uk/news/2018/02/three-in-10-](https://www.which.co.uk/news/2018/02/three-in-10-pharmacies-not-following-safety-guidelines-finds-which-investigation)  
39  
40  
41 [pharmacies-not-following-safety-guidelines-finds-which-investigation](https://www.which.co.uk/news/2018/02/three-in-10-pharmacies-not-following-safety-guidelines-finds-which-investigation) Accessed 23/07/18  
42  
43

44  
45  
46 11 Inch J, Porteous T, Maskrey V, *et al*. It's not what you do it's the way that it's measured:

47  
48 Quality assessment of minor ailment management in community pharmacies. *Int J Pharm Pract*.

49  
50  
51 2016: DOI: 10.1111/ijpp.12305  
52  
53  
54  
55  
56  
57

1  
2  
3  
4 12 NHS England. Pharmacy Quality Payments: Quality Criteria Guidance. 2017.

5  
6 [https://www.england.nhs.uk/wp-content/uploads/2017/02/quality-payments-quality-criteria-](https://www.england.nhs.uk/wp-content/uploads/2017/02/quality-payments-quality-criteria-guidance-1.pdf)  
7 [guidance-1.pdf](https://www.england.nhs.uk/wp-content/uploads/2017/02/quality-payments-quality-criteria-guidance-1.pdf) Accessed 23/07/18  
8  
9

10  
11  
12  
13  
14 13 Watson MC, Skea Z. Jugglers and tightrope walkers: The challenge of delivering quality  
15 community pharmacy services. *PLoS ONE* 13(7): e0200610. doi:10.1371/journal.pone.0200610  
16  
17

18  
19  
20  
21 14 Health and Social Care Alliance Scotland. <https://www.alliance-scotland.org.uk/> Accessed  
22 23/07/18  
23  
24

25  
26  
27  
28 15 Bowling A. *Research Methods in Health Care*. Open University Press, Buckingham. 2002  
29  
30

31  
32  
33 16 Bowie P, McNab D, Ferguson J, *et al*. Quality improvement and person-centredness: A  
34 participatory mixed methods study to develop the 'always event' concept for primary care. *BMJ*  
35 *Open* 2015;5:e006667. doi: 10.1136/bmjopen-2014-006667doi: 10.1136/bmjopen-2014-  
36 006667  
37  
38  
39  
40  
41  
42  
43  
44  
45

46 17 Institute for Healthcare Improvement: Always Events Toolkit.

47  
48 <http://www.ihl.org/resources/Pages/Tools/Always-Events-Toolkit.aspx> Accessed 23/07/18  
49  
50  
51  
52  
53  
54  
55  
56  
57

- 1  
2  
3  
4 18 Attride-Stirling J. Thematic networks: an analytic tool for qualitative research. *Qualitative*  
5  
6  
7 research. 2001;1(3):385-405  
8  
9  
10  
11 19 Braun V, Clarke V. Using thematic analysis in psychology. *Qualitative research in psychology.*  
12  
13  
14 2006;3(2):77-101  
15  
16  
17  
18 20 Ritchie J, Spencer L, O'Connor W. Carrying out qualitative analysis. *Qualitative research*  
19  
20  
21 practice: A guide for social science students and researchers. 2003;1  
22  
23  
24  
25  
26 21 Tong A, Sainsbury P, Craig J. Consolidated criteria for reporting qualitative research (COREQ):  
27  
28 A 32-item checklist for interviews and focus groups. *Int J Qual Health Care.* 2007;19(6):349–357.  
29  
30  
31 pmid:17872937  
32  
33  
34 22 Marshall MN. Sampling for qualitative research. *Fam Pract* 1996;13:522-25  
35  
36  
37  
38  
39 23 Halsall D, Noyce PR, Ashcroft DM. Characterizing healthcare quality in the community  
40  
41  
42 pharmacy setting: Insights from a focus group study. *Res Soc Admin Pharm.* 2012;8(5):360-370  
43  
44  
45  
46 24 Grey E, Harris M, Rodham K, Weiss MC. Characteristics of good quality pharmaceutical  
47  
48  
49 services common to community pharmacies and dispensing general practices. *Int J Pharm Pract.*  
50  
51  
52 2016;24(5):311-318  
53  
54  
55  
56  
57  
58  
59  
60

1  
2  
3  
4 25 Blalock SJ, Keller S, Nau D, et al. Development of the consumer assessment of pharmacy  
5 services survey. *J Am Pharm Assoc* 201;52:324-332.  
6  
7

8  
9  
10  
11 26 Shiyabola OO, Mort JR. Patients' perceived value of pharmacy quality measures: A mixed-  
12 methods study. *BMJ Open*. 2015;5(1). doi: 10.1136/bmjopen-2014-006086  
13  
14

15  
16  
17  
18 27 Warholak TL, Patel M, Rosenthal M, West-Strum D, Ettienne EB, Nunlee-Bland G, et al.  
19 Patient perceptions of a pharmacy star rating model *J Am Pharm Assoc* (2003). 2017 May -  
20 Jun;57(3):311-317. doi: 10.1016/j.japh.2017.01.011.  
21  
22  
23

24  
25  
26  
27  
28 29 Pharmaceutical Services Negotiating Committee: Quality Payments. 2017.  
30 <http://psnc.org.uk/services-commissioning/essential-services/quality-payments/> Accessed  
31  
32  
33 23/07/18  
34  
35

36  
37  
38 28 Porteous T, Ryan M, Bond C, *et al*. Managing Minor Ailments; The Public's Preferences for  
39 Attributes of Community Pharmacies. A Discrete Choice Experiment. *PLoS ONE* 11(3):  
40 e0152257. Doi:10.1371/journal.pone.0152257  
41  
42  
43  
44  
45  
46  
47  
48  
49  
50  
51  
52  
53  
54  
55  
56  
57  
58  
59  
60

**Manuscript:** Person-centeredness, Professionalism and Privacy: How does the public conceptualise the quality of care and its measurement in community pharmacies in the United Kingdom?

### Consolidated criteria for reporting qualitative studies (COREQ): 32-item checklist

Developed from:

Tong A, Sainsbury P, Craig J. Consolidated criteria for reporting qualitative research (COREQ): a 32-item checklist for interviews and focus groups. *International Journal for Quality in Health Care*. 2007. Volume 19, Number 6: pp. 349 – 357

| No. Item                                       | Guide questions/description                                                                              |                                                                                                                             | Reported on Page # |
|------------------------------------------------|----------------------------------------------------------------------------------------------------------|-----------------------------------------------------------------------------------------------------------------------------|--------------------|
| <b>Domain 1: Research team and reflexivity</b> |                                                                                                          |                                                                                                                             |                    |
| <i>Personal Characteristics</i>                |                                                                                                          |                                                                                                                             |                    |
| 1. Interviewer/facilitator                     | Which author/s conducted the interview or focus group?                                                   | MW                                                                                                                          | 4,6,19             |
| 2. Credentials                                 | What were the researcher's credentials? E.g. PhD, MD                                                     | PhD                                                                                                                         | 1                  |
| 3. Occupation                                  | What was their occupation at the time of the study?                                                      | Professor, Department of Pharmacy and Pharmacology                                                                          | 1                  |
| 4. Gender                                      | Was the researcher male or female?                                                                       | Female                                                                                                                      | 6                  |
| 5. Experience and training                     | What experience or training did the researcher have?                                                     | Over 20 years' experience of health services research.                                                                      | 6                  |
| <i>Relationship with participants</i>          |                                                                                                          |                                                                                                                             |                    |
| 6. Relationship established                    | Was a relationship established prior to study commencement?                                              | No                                                                                                                          | -                  |
| 7. Participant knowledge of the interviewer    | What did the participants know about the researcher? e.g. personal goals, reasons for doing the research | Participants were briefed on the purpose of the study and understood that it was a research project being undertaken by MW. | 6,7                |

|                                          |                                                                                                                                                          |                                                                                                                                                                                                  |     |
|------------------------------------------|----------------------------------------------------------------------------------------------------------------------------------------------------------|--------------------------------------------------------------------------------------------------------------------------------------------------------------------------------------------------|-----|
|                                          |                                                                                                                                                          | Ethical approval had been granted, participants reviewed the participant information documentation prior to giving their written informed consent.                                               |     |
| 8. Interviewer characteristics           | What characteristics were reported about the interviewer/facilitator? e.g. Bias, assumptions, reasons and interests in the research topic                | MW is a registered pharmacist, which was a potential source of bias. However, MW did not disclose her background unless specifically asked. No other interviewer-related biases were identified. | 19  |
| <b>Domain 2: study design</b>            |                                                                                                                                                          |                                                                                                                                                                                                  |     |
| <i>Theoretical framework</i>             |                                                                                                                                                          |                                                                                                                                                                                                  |     |
| 9. Methodological orientation and Theory | What methodological orientation was stated to underpin the study? e.g. grounded theory, discourse analysis, ethnography, phenomenology, content analysis | Open coding with thematic analysis followed by a framework approach to support the systematic analysis of data around the research questions.                                                    | 7-8 |
| <i>Participant selection</i>             |                                                                                                                                                          |                                                                                                                                                                                                  |     |
| 10. Sampling                             | How were participants selected? e.g. purposive, convenience, consecutive, snowball                                                                       | Recruited via email using existing research networks, community groups, and personal networks. A maximum variation sample was recruited using a combination of                                   | 6   |

|                                  |                                                                                   |                                                                                                                                                                                              |                 |
|----------------------------------|-----------------------------------------------------------------------------------|----------------------------------------------------------------------------------------------------------------------------------------------------------------------------------------------|-----------------|
|                                  |                                                                                   | purposive, convenience, and snowballing techniques.                                                                                                                                          |                 |
| 11. Method of approach           | How were participants approached? e.g. face-to-face, telephone, mail, email       | Email                                                                                                                                                                                        | 6               |
| 12. Sample size                  | How many participants were in the study?                                          | 20                                                                                                                                                                                           | 9               |
| 13. Non-participation            | How many people refused to participate or dropped out? Reasons?                   | No participants who agreed to take part in the study subsequently refused to participate, withdrew their consent, or dropped out.                                                            | -               |
| <i>Setting</i>                   |                                                                                   |                                                                                                                                                                                              |                 |
| 14. Setting of data collection   | Where was the data collected? e.g. home, clinic, workplace                        | Data were collected via telephone or face-to-face in a non-clinical setting.                                                                                                                 | 6               |
| 15. Presence of non-participants | Was anyone else present besides the participants and researchers?                 | No.                                                                                                                                                                                          | 6               |
| 16. Description of sample        | What are the important characteristics of the sample? e.g. demographic data, date | Age range 20-79; 5 males, 15 females. Data was collected between August 2016 and July 2017.                                                                                                  | 6, 10 (Table 1) |
| <i>Data collection</i>           |                                                                                   |                                                                                                                                                                                              |                 |
| 17. Interview guide              | Were questions, prompts, guides provided by the authors? Was it pilot tested?     | Interviews / focus groups were semi-structured using a topic guide. It was not piloted, but was modified throughout the data collection process to incorporate relevant topics identified in | 6-7             |



|                                        |                                                                          |                                                                                                                        |     |
|----------------------------------------|--------------------------------------------------------------------------|------------------------------------------------------------------------------------------------------------------------|-----|
|                                        |                                                                          | earlier interviews and focus groups.                                                                                   |     |
| 18. Repeat interviews                  | Were repeat interviews carried out? If yes, how many?                    | No                                                                                                                     | -   |
| 19. Audio/visual recording             | Did the research use audio or visual recording to collect the data?      | Yes. Interviews / focus groups were recorded using an audio recorder.                                                  | 6   |
| 20. Field notes                        | Were field notes made during and/or after the interview or focus group?  | No additional notes were made.                                                                                         | -   |
| 21. Duration                           | What was the duration of the interviews or focus group?                  | The semi-structured interviews / focus groups lasted an average of 51 minutes (range 31 to 74 minutes).                | 6   |
| 22. Data saturation                    | Was data saturation discussed?                                           | Yes. Recruitment ceased once theoretical saturation was reached (i.e. when no new themes were emerging from the data). | 6   |
| 23. Transcripts returned               | Were transcripts returned to participants for comment and/or correction? | No.                                                                                                                    | -   |
| <b>Domain 3: analysis and findings</b> |                                                                          |                                                                                                                        |     |
| <i>Data analysis</i>                   |                                                                          |                                                                                                                        |     |
| 24. Number of data coders              | How many data coders coded the data?                                     | Two.                                                                                                                   | 7,8 |
| 25. Description of the coding tree     | Did authors provide a description of the coding tree?                    | Coding described in methods section.                                                                                   | 7-8 |
| 26. Derivation of themes               | Were themes identified in advance or derived from the data?              | Themes were derived from the data.                                                                                     | 7-8 |
| 27. Software                           | What software, if applicable, was used to                                | Nvivo.                                                                                                                 | 7-8 |

|                                  |                                                                                                                                 |                                                                                               |       |
|----------------------------------|---------------------------------------------------------------------------------------------------------------------------------|-----------------------------------------------------------------------------------------------|-------|
|                                  | manage the data?                                                                                                                |                                                                                               |       |
| 28. Participant checking         | Did participants provide feedback on the findings?                                                                              | No.                                                                                           | -     |
| <i>Reporting</i>                 |                                                                                                                                 |                                                                                               |       |
| 29. Quotations presented         | Were participant quotations presented to illustrate the themes/findings? Was each quotation identified? e.g. participant number | Yes, themes/findings were supported with direct quotes attributed to anonymised participants. | 10-18 |
| 30. Data and findings consistent | Was there consistency between the data presented and the findings?                                                              | Yes.                                                                                          | 10-18 |
| 31. Clarity of major themes      | Were major themes clearly presented in the findings?                                                                            | Yes.                                                                                          | 10-18 |
| 32. Clarity of minor themes      | Is there a description of diverse cases or discussion of minor themes?                                                          | No.                                                                                           | N/A   |

# BMJ Open

## How does the public conceptualise the quality of care and its measurement in community pharmacies in the United Kingdom?: A qualitative interview study

|                                 |                                                                                                                                                                                                                                                |
|---------------------------------|------------------------------------------------------------------------------------------------------------------------------------------------------------------------------------------------------------------------------------------------|
| Journal:                        | <i>BMJ Open</i>                                                                                                                                                                                                                                |
| Manuscript ID                   | bmjopen-2018-027198.R1                                                                                                                                                                                                                         |
| Article Type:                   | Research                                                                                                                                                                                                                                       |
| Date Submitted by the Author:   | 08-Jan-2019                                                                                                                                                                                                                                    |
| Complete List of Authors:       | Watson, Margaret; University of Bath, Department of Pharmacy and Pharmacology<br>Silver, Karin; University of Bath, Department of Pharmacy and Pharmacology<br>Watkins, Ross; University of Bristol Medical School, Population Health Sciences |
| <b>Primary Subject Heading</b>: | Health services research                                                                                                                                                                                                                       |
| Secondary Subject Heading:      | Pharmacology and therapeutics, Qualitative research                                                                                                                                                                                            |
| Keywords:                       | Quality in health care < HEALTH SERVICES ADMINISTRATION & MANAGEMENT, Organisation of health services < HEALTH SERVICES ADMINISTRATION & MANAGEMENT, PUBLIC HEALTH, QUALITATIVE RESEARCH                                                       |
|                                 |                                                                                                                                                                                                                                                |

SCHOLARONE™  
Manuscripts

1  
2  
3 How does the public conceptualise the quality of care and its measurement in community  
4 pharmacies in the United Kingdom?: A qualitative interview study  
5  
6  
7  
8  
9

10 <sup>1</sup>Watson M\*, <sup>1</sup>Silver K, <sup>2</sup>Watkins R.  
11  
12

13  
14 <sup>1</sup>Department of Pharmacy and Pharmacology, University of Bath  
15

16 <sup>2</sup>School of Social and Community Medicine, University of Bristol  
17  
18

19 \*Corresponding author  
20

21 Professor Margaret C Watson  
22

23 Department of Pharmacy and Pharmacology, University of Bath, Bath, England, BA2 7AY.  
24

25 Email: [m.c.watson@bath.ac.uk](mailto:m.c.watson@bath.ac.uk) Telephone: 01225 386787  
26  
27  
28

29 Ms Karin Silver  
30

31 Department of Pharmacy and Pharmacology, University of Bath, Bath, England, BA2 7AY.  
32

33 Dr Ross Watkins  
34

35 School of Social and Community Medicine, University of Bristol, Bristol, England, BS8 2PS.  
36  
37  
38  
39

40 Keywords:  
41

42 Community pharmacy services; Quality of Health Care; Quality Improvement; Qualitative  
43 Research  
44  
45  
46  
47  
48  
49  
50  
51  
52  
53  
54  
55  
56  
57  
58  
59  
60

## ABSTRACT

### Objectives

This study explored citizens' perspectives about the quality of community pharmacy services in the United Kingdom (UK) and whether and how the quality of community pharmacy services should be measured.

### Design

Semi-structured interviews and focus groups were conducted and were audio-recorded, transcribed and analysed systematically using an interpretive approach.

### Participants

Members of the public.

### Setting

Scotland, England and Wales.

### Results

Data were collected from 20 participants: 11 interviews and two focus groups (in community settings, with five and four participants). Quality was conceptualised as multi-dimensional with inter-related overarching themes of person-centeredness, professionalism, and privacy. The importance of relational aspects with pharmacy personnel was emphasised including the need for a "friendly" caring service, continuity of care, being known to personnel, including their awareness of individual's health conditions: *"it's quite a personal service I would say...I think it means that they care about your welfare"*. Participants discussed the importance of a professional approach to customer interactions including staff behaviour and appearance. Pharmacy design influenced perceptions of privacy, including having sufficient space or a separate consultation room to promote confidential consultations with a pharmacist. Participants suggested that quality assurance is needed to improve quality and to inspire

1  
2  
3 confidence in the public *“it would drive up quality standards overall”* but suggested that  
4  
5 quality ratings were unlikely to influence their use of specific pharmacies. They emphasised  
6  
7 the need for multi-dimensional quality ratings and for transparency with their derivation.  
8  
9

## 10 11 12 13 Conclusions

14  
15 The public conceptualise quality of community pharmacy services as multidimensional and  
16  
17 value relational aspects of care provided by personnel in this setting. Whilst the development  
18  
19 and application of quality indicators may drive improvement, it seems unlikely to influence  
20  
21 the public’s use of individual pharmacies.  
22  
23  
24  
25  
26  
27

## 28 Article Summary

29 Strengths and Limitations – 5 bullets re methods, not results

- 30  
31
- 32 • a diverse range of individuals participated in terms of age, sex, and country but not  
33 ethnicity  
34
  - 35 • data collection was undertaken by one experienced health service researcher who was  
36 also a pharmacist  
37
  - 38 • data analysis was undertaken by two experienced qualitative researchers neither of  
39 whom were pharmacists. This ensured a balanced approach to the analysis and  
40 interpretation of the data.  
41
  - 42 • all key recurring themes were identified with no new themes emerging in later  
43 interviews or focus groups.  
44  
45  
46  
47  
48  
49  
50  
51  
52  
53  
54  
55  
56  
57  
58  
59  
60

## INTRODUCTION

Each year in the United Kingdom (UK), an estimated 650,000 emergency department (ED) consultations and 18 million general practitioner (GP) consultations are for conditions (hereafter referred to as self-care consultations) that can be treated effectively by community pharmacy personnel, equating to around £1.1 billion in resources.[1, 2] In England, each of the 11699 community pharmacies [3] serves an average population of around 5600 citizens [4] of whom an estimated 89% are within 20 minutes' walk of a community pharmacy.[5] National policies and resources recommend the public to seek care from the most 'appropriate' provider.[6,7,8] Reassurance is needed regarding the quality of care provided in community pharmacies in general, and more specifically for self-care, which has been shown to vary, depending upon the criteria used.[9,10,11] Whilst national quality indicators for community pharmacy were introduced in England in 2017 [12], none refer to the management of self-care consultations despite this service being regarded the 'shop window' of community pharmacy.[13] As such, the study presented here is part of a research programme to co-produce quality indicators for self-care consultations.

The aim of this study was to conceptualise public perceptions and beliefs about the:

- quality of community pharmacy services in general
- management of self-care consultations
- measurement of the quality of community pharmacy services

## **METHODS**

### **Study Design**

Interviews and focus groups were conducted with members of the public with the method used varying according to participant availability and preference.

### **Recruitment, sampling, and consent**

Participants were recruited through existing networks such as Health and Social Care Alliance Scotland,[14] as well as community groups and personal networks. Individuals were eligible to participate if they used community pharmacy services, and understood and were able to communicate in English. An email was sent to potential participants with information about the study, advising them to contact the research team if they wished to participate. Recruitment ceased once theoretical saturation was reached (i.e. when no new themes were emerging from the data). A maximum variation sample was recruited using a combination of purposive, convenience, and snowballing techniques.[15]

### **Data Collection**

One female researcher (MW), who is a registered pharmacist with over 20 years' experience of health services research, undertook all data collection. Audio-recorded face-to-face or telephone interviews were conducted between August 2016 and July 2017, and lasted an average of 51 minutes (range 31 to 74 minutes). No other individuals were present during the interviews or focus groups. The topic (interview) guide was informed by existing work on quality and quality improvement, as well as a precedent interview study involving pharmacists.[13] It was not piloted prior to use but was modified throughout the data collection process to incorporate relevant topics identified in earlier interviews and focus



1  
2  
3 groups. The concepts of “what matters to you”, “always events” and “never events” were  
4 included.[13,16] Always events are “aspects of the patient experience that are so important  
5  
6 to patients and families that health care providers must aim to perform them consistently and  
7  
8 reliably for every patient, every time”.[17]  
9  
10  
11  
12  
13

14  
15 Quality measurement was explored in general terms and more specifically in relation to the  
16 use of rating or accreditation systems. The same topic guide was used for interviews and focus  
17  
18 groups. As new issues or themes emerged, they were included in subsequent  
19  
20 interviews/focus groups. All participants provided written consent to participate. On  
21  
22 completion of the interviews/focus groups, participants were offered a ‘thank you’ voucher  
23  
24 worth £20.  
25  
26  
27  
28  
29  
30  
31

### 32 **Data Analysis**

33  
34 Audio-recordings were transcribed verbatim by an experienced transcriber and accuracy  
35  
36 checked (KS/RW). The data were analysed systematically using Thematic Analysis.[18,19] The  
37  
38 focus of the analysis was to organise the data in a meaningful way according to the *a priori*  
39  
40 aims of the study, as well as to allow for the identification of topics and issues of importance  
41  
42 to participants. NVivo 11 (QSR International) was used to help organise, code and explore the  
43  
44 data. Two researchers (KS, RW) first familiarised themselves with the transcripts and coded  
45  
46 to broad topic areas (structuring codes). The next (extensive and iterative) phase involved the  
47  
48 identification of themes and sub-themes to reflect the research questions (a priori  
49  
50 codes/nodes) and from within the data itself (in vivo codes/nodes). As the analysis  
51  
52 progressed, conceptual and crosscutting themes were identified and coded, in addition to  
53  
54 relevant topic codes.  
55  
56  
57  
58  
59  
60

1  
2  
3 Each transcript was coded by one researcher (KS or RW), with most coded by two researchers  
4  
5 (KS, RW) to ensure reliability. The themes, their names and explanations were continually  
6  
7 refined through discussion between the researchers to ensure that they were distinct from  
8  
9 other themes, internally coherent and consistently applied. The coded data were explored  
10  
11 through queries and other NVivo tools, and themes were mapped to identify connections.  
12  
13  
14  
15 Once coding was complete, a Framework approach [20] was used to support the systematic  
16  
17 analysis of data around the research questions, to enable an assessment of prevalence and  
18  
19 coverage of key themes (i.e. dimensions of quality). Further interpretation and discussion, to  
20  
21 ensure that analytical claims were congruent with the extracts, culminated in the creation of  
22  
23 a thematic resource document. This reported all the relevant coded data under overarching  
24  
25 themes/headings, with some extracts being duplicated under two or more themes (e.g. in the  
26  
27 case of richness or complexity). This study is reported in accordance with COREQ [21].  
28  
29  
30  
31  
32  
33  
34

### 35 **Consent and Ethical Review**

36  
37 The University of Aberdeen College Ethics Review Board provided ethical review and approval  
38  
39 for the study (CERB/2015/6/1208).  
40  
41  
42  
43  
44

### 45 **PATIENT AND PUBLIC INVOLVEMENT STATEMENT**

46  
47 We did not involve PPI representatives in the development of the research questions and  
48  
49 outcome measures or in the design of the study. However, patients and the public were  
50  
51 recruited through: the Scottish Patient Alliance; two participants in England were recruited  
52  
53 through patient and public involvement (PPI) groups; and the English and Welsh focus group  
54  
55 participants were recruited through professional contacts of the researchers. Study results  
56  
57 will be disseminated to all participants who expressed an interest in being informed of the  
58  
59  
60

1  
2  
3 results using a plain language summary that will be sent via email or in the post. All  
4  
5 participants were thanked in the acknowledgements.  
6  
7  
8  
9  
10  
11  
12  
13  
14  
15  
16  
17  
18  
19  
20  
21  
22  
23  
24  
25  
26  
27  
28  
29  
30  
31  
32  
33  
34  
35  
36  
37  
38  
39  
40  
41  
42  
43  
44  
45  
46  
47  
48  
49  
50  
51  
52  
53  
54  
55  
56  
57  
58  
59  
60

For peer review only

## RESULTS

In total, 20 individuals participated (Scotland (n=7) all interviewed individually; England (one focus group (n=4) and four individual interviews (one of which was face-to-face)); and Wales (one focus group (n=5)) (Table 1). The majority were British and female. Four participants had been employed previously in health-related employment (none reported pharmacy-related employment although one male sometimes worked as a delivery driver for a local pharmacy). The focus group in England comprised four women in their 30s, all parents of young children. The focus group in Wales comprised three women in their 40s and 50s who were all mothers, and two graduate students in their 20s. All seven participants in Scotland were recruited through the Scottish Patient Alliance, two participants in England were recruited through patient and public involvement (PPI) groups, and the English and Welsh focus group participants were recruited through professional contacts of the researchers (MW, RW).

Table 1 Participant characteristics

| Identifier | Country  | Ethnicity      | M/F | Range | Healthcare background |
|------------|----------|----------------|-----|-------|-----------------------|
| I1         | Scotland | White Scottish | F   | 50-59 | NS                    |
| I2         | Scotland | Irish          | F   | 60-69 | Yes (retired)         |
| I3         | Scotland | White Scottish | F   | 40-49 | NS                    |
| I4         | Scotland | White Scottish | F   | 20-29 | No                    |
| I5         | Scotland | White British  | F   | 50-59 | NS                    |
| I6         | Scotland | White          | M   | 70-79 | No                    |
| I7         | Scotland | British        | M   | 70-79 | Yes                   |
| I8         | England  | White British  | F   | 70-79 | Yes                   |
| I9         | England  | White British  | M   | 60-69 | No                    |
| I10        | England  | British        | M   | 70-79 | No                    |
| I11        | England  | White          | F   | 50-59 | No                    |
| F1_1       | England  | British        | F   | 30-39 | No                    |
| F1_2       | England  | British        | F   | 30-39 | No                    |
| F1_3       | England  | White British  | F   | 30-39 | No                    |
| F1_4       | England  | British        | F   | 30-39 | No                    |
| F2_1       | Wales    | British        | F   | 50-59 | No                    |
| F2_2       | Wales    | White European | F   | 20-29 | No                    |
| F2_3       | Wales    | White British  | M   | 20-29 | No                    |
| F2_4       | Wales    | NS             | F   | 40-49 | No                    |
| F2_5       | Wales    | White British  | F   | 40-49 | Yes                   |

I Interview F Focus Group NS Not stated

### Dimensions of Quality: The three P's.

When asked “*what matters to you*”, participants conceptualised the quality of community pharmacies as multi-dimensional and inter-related with three over-arching themes: person-centeredness; professionalism; and privacy. Selected quotes are presented to illustrate these dimensions and themes (Identifiers I and F denote interview and focus group participants, respectively).

1  
2  
3 Person-centeredness  
4

5 Participants emphasised the importance of relational aspects with pharmacy personnel  
6 including the need for a “friendly” caring service, continuity of care, and the staff ‘knowing’,  
7  
8 the individual, including awareness of their health conditions.  
9  
10  
11  
12  
13  
14

15 *I4: The staff are really friendly, and helpful, ... , it's quite a personal service I would*  
16 *say...I think it means that they care about your welfare.*  
17

18  
19  
20  
21  
22  
23 *I8: I like continuity... It makes me feel safer, and um...it's like your doctor, you want*  
24 *your doctor to know you.. it's nice to think that this person knows you and might*  
25 *actually take an interest in you as opposed to you're just the next customer.*  
26  
27  
28  
29  
30  
31

32 They generally wanted easy access to a pharmacist and pharmacies in terms of geographical  
33 proximity and location, as well as opening hours, which suited their needs and lifestyle, and  
34 suitable parking or access by public transport. However, others were willing to travel further  
35 for specific medication needs, or a better service.  
36  
37  
38  
39  
40  
41  
42  
43  
44

45 Some also wanted the pharmacist to be visible and accessible in the pharmacy.  
46  
47  
48  
49

50 *I9: ..direct access, easy access to the pharmacist (...) because there are some*  
51 *pharmacists [sic] you go to where the registered pharmacists is like someone hiding*  
52 *behind...a curtain and you don't see them.*  
53  
54  
55  
56  
57  
58  
59  
60

1  
2  
3 *F1\_1: They [counter staff] are the gatekeepers aren't they? ..the pharmacist is in the*  
4 *back, somewhere you know? It does feel like you have to have something really*  
5 *legitimate to speak to them rather than them being available to speak to you (...). I*  
6 *don't know the rules. I would like to know the answer to that – when am I entitled to*  
7 *speak to the pharmacist?*  
8  
9  
10  
11  
12  
13  
14  
15  
16  
17

18 Interviewees felt that staff should take time to listen and communicate clearly, involve people  
19 in decisions around their own treatment, be responsive to personal requirements and  
20 preferences, and be respectful of individual concerns.  
21  
22  
23  
24  
25  
26

27 *I10: [there should always be] a feeling that the person you are talking to has time for*  
28 *you obviously. If you have the feeling that you are being a nuisance then you would be*  
29 *reluctant to ask a second time.*  
30  
31  
32  
33  
34  
35  
36

### 37 Professionalism

38  
39 Participants discussed the importance of a professional approach in customer interactions  
40 including staff behaviour and appearance. Although not all expected staff to wear a uniform,  
41 it was commonly felt that they should be identifiable, for example, by wearing name badges.  
42  
43  
44  
45  
46  
47  
48

49 *I11: The staff would look clean and smart and presentable and the name badge*  
50 *confirming that they are not just Saturday girls, they are kind of trained professionals.*  
51  
52  
53  
54  
55

56 *F1\_2: I guess maybe for them to tell you who they are - introduce themselves. 'I am a*  
57 *pharmacist' or - so that you know exactly who you're dealing with.*  
58  
59  
60

1  
2  
3 People expected staff (including, but not only, pharmacists) to be competent, suitably trained,  
4  
5 qualified and confident in their ability to diagnose, advise and prescribe, and for all staff to be  
6  
7 knowledgeable about over-the-counter (OTC) medication (i.e. medicines, which can be  
8  
9 sold/bought without the need for a prescription), and be able to provide (cheaper)  
10  
11 alternatives.  
12  
13  
14  
15  
16  
17

18 *F2\_3: If they are still uncertain they should always refer you back to your GP .*  
19  
20

21  
22  
23 *F1\_3: I don't know if it was the pharmacist or the pharmacy assistant to be honest*  
24  
25 *but she basically advised me to take a slightly cheaper model of the medicine... .. And*  
26  
27 *I really appreciated it, that's a nice thing to do.*  
28  
29  
30

31  
32 Counter staff were expected to defer to the pharmacist if necessary, who should then refer  
33  
34 onward as appropriate, but not be overly risk averse (a frustration for parents of young  
35  
36 children).  
37  
38  
39  
40  
41

42 *F1\_2: [I] went a few times when [name of child] was younger and then because I just*  
43  
44 *kept getting...'I don't know what's wrong with him, he's got like a bit of a rash, or*  
45  
46 *something, is there anything you can give me?' and they were like 'oh we wouldn't*  
47  
48 *like to say just go and see the GP'. Now .. I will go straight to the GP ..because ..they*  
49  
50 *don't ever seem keen to actually sort of [sic] not diagnose.*  
51  
52  
53  
54  
55  
56  
57  
58  
59  
60



1  
2  
3 Participants felt it was important that a pharmacy felt clean, light and “hygienic”. It was felt  
4  
5 that a good quality pharmacy should have sufficient medication stock so that prescriptions  
6  
7 could be fully filled, in a timely manner, to avoid return visits.  
8  
9

10  
11  
12  
13 *I6: it's got to be how quickly you receive whatever medicine or treatment you need ...*  
14  
15 *that's the most important thing.*  
16  
17

## 20 Privacy

21  
22 Privacy was an important consideration, and included physical characteristics of the  
23  
24 pharmacy in supporting privacy, with either a separate consultation room or a dedicated  
25  
26 private area, and the need to have confidential conversations with the pharmacist.  
27  
28  
29

30  
31  
32 *I2: private consultation room that's accessible. Not at the back of the shop (...) I don't*  
33  
34 *think there should be over the counter consultations at the same section where people*  
35  
36 *are coming to buy their cosmetics or whatever or pick up their prescriptions.. it should*  
37  
38 *be separate, in fact go into [supermarket pharmacy] you've got to queue up with*  
39  
40 *everybody that's wanting their fags, or wants a lottery ticket.*  
41  
42  
43  
44  
45

46  
47 Privacy was interwoven with confidentiality, which in turn, influenced confidence and trust in  
48  
49 pharmacy personnel.  
50  
51

52  
53  
54 *I11: ..they reassure you ..().you that it is a private consultation maybe and that your*  
55  
56 *data is protected as a minimum I suppose.*  
57  
58  
59  
60

1  
2  
3 *I5: We do have a village pharmacy, but because of the lack of confidentiality I am now*  
4 *taking myself a 52 mile round trip to get a prescription. ....() It matters that I feel*  
5 *confident in the service that I'm being given, that I'm confident in the fact that my*  
6 *information is being kept confidential, and that the fact is that the pharmacists on the*  
7 *whole genuinely are trying to do their best by patients.*

### 17 **Measuring Quality in Community Pharmacies**

18  
19  
20 Participants were asked whether the quality of community pharmacies should be measured  
21 and if so, what measures to use. Participants suggested that quality assurance is needed to  
22 improve quality as well as to inspire confidence in the public.

23  
24  
25  
26  
27  
28  
29  
30 *I5: ..the only way you're going to know that you're going to get a good service is to*  
31 *actually publish the fact that you are getting a good service. It's like in hospital wards*  
32 *for cleanliness, now they're putting up figures showing that they've managed to*  
33 *eliminate for the last 100 days - they've had no MRSA - that gives confidence to*  
34 *patients when they read that and see these facts and figures. And they're put out there*  
35 *for everybody to see not just the few, that's important.(...) .it would be about saying to*  
36 *the good pharmacists 'well done you're getting it right every time'. But it's also saying*  
37 *to the other ones 'you need to pull your socks up'.*

38  
39  
40  
41  
42  
43  
44  
45  
46  
47  
48  
49  
50  
51  
52 There was recognition that quality could be difficult to measure across varied services and  
53 discussion of which criteria to use.  
54  
55  
56  
57  
58  
59  
60

1  
2  
3 *F2\_4: How effective was the information or how accurate was the information you*  
4 *received, did it work for you, was it right or was it wrong or, how satisfied were you on*  
5 *what you were told, and I think that's it in a nutshell really.(...)*  
6  
7  
8  
9

10  
11  
12 Suggested methods of quality measurement included: customer satisfaction surveys/instant  
13 feedback; audit; mystery shoppers; and the use of professional standards. The use of rating  
14 systems was explored specifically. Participants identified similar systems associated with  
15 other aspects of life, including: shopping (Amazon); travel (Trip Advisor); restaurants (food  
16 hygiene ratings); health (hospital wards); and education services (Ofsted (Office for Standards  
17 in Education)). Many participants expressed broadly positive attitudes towards rating  
18 systems, whilst others questioned their usefulness based upon the use of similar systems  
19 applied to other areas e.g. education. The relevance of these systems to community  
20 pharmacies was also questioned due to the more complex, less “transactional” element of  
21 service/customer interaction.  
22  
23  
24  
25  
26  
27  
28  
29  
30  
31  
32  
33  
34  
35  
36  
37  
38  
39

40 *I9: There are ratings systems for things that - where a service can damage the public.*  
41 *..(.. we already have food safety ratings for cafes and restaurants. One might ask why*  
42 *we don't have one for something where the service could kill you more effectively, or*  
43 *more easily..(.. you can tell a reasonable restaurant or cafe from your first consumer*  
44 *experience, you won't necessarily know a really good pharmacy from a less than good*  
45 *pharmacy.*  
46  
47  
48  
49  
50  
51  
52  
53  
54  
55

56  
57 Participants described potential positive, negative and unintended consequences of a star-  
58 type rating system for reporting quality.  
59  
60

1  
2  
3 *I4: I think it would drive up quality standards overall. Yeah, I think it would be a good*  
4 *measure. If chemists know that they're being rated they obviously wouldn't want a bad*  
5 *rating.*  
6  
7  
8  
9

10  
11  
12  
13 *I8: .. I realise how frightened people are of their health...so I think if they went into a*  
14 *chemist shop and saw that maybe it only had 3 and room for improvement, I think*  
15 *they'd [the public] get nervous about that. So yes, there can be a rating but I don't*  
16 *think it really needs to be displayed when it comes to health.*  
17  
18  
19  
20  
21  
22  
23  
24

25 Some participants considered rating systems to be too subjective.  
26  
27  
28  
29

30 *F2\_1: .. if it was general public rating then I'd be a bit sceptical but if it came from a*  
31 *professional going in and give it an accredited, like the scores on the door, like it comes*  
32 *from a governing body ... then I would have more tendency to go with what they said,*  
33 *.. a non-biased organisation .. and you were judged (...) Maybe give it different*  
34 *categories, maybe the customer service side ask the general public, but as far as the*  
35 *professional - the accuracy of what was given out and the way everything was kept -*  
36 *leave that part to the professionals because I wouldn't be anyone to judge.*  
37  
38  
39  
40  
41  
42  
43  
44  
45  
46  
47  
48  
49

50 Most participants stated that they would take notice of star ratings if they existed, but  
51 wouldn't necessarily base their choice of pharmacy upon them. Some preferred to make their  
52 own judgement. For most, the decision to use a particular pharmacy was contingent on a  
53 number of, potentially overlapping, factors including accessibility, personal needs, time  
54 available and perceived urgency. Given that most also expressed general satisfaction with  
55  
56  
57  
58  
59  
60

1  
2  
3 the pharmacy they used, and some had no realistic choice of using another, there was some  
4  
5 scepticism around the value of a star ratings type system in terms of what it might be based  
6  
7 on and how it would be used.  
8  
9

10  
11  
12  
13 *F2\_2: It wouldn't affect my choice of the pharmacy unless it was maybe a one star out*  
14  
15 *of five then I'd be like well 'what's going on here like why' but if it was four or three I'd*  
16  
17 *probably wouldn't care because I probably wouldn't understand what the rating is*  
18  
19 *based on, who gave this rating to this particular pharmacy. I mean in restaurants I*  
20  
21 *know that if the hygiene -so I can imagine what it means - but in a pharmacy, but is it*  
22  
23 *the customer service, is it the way they organise their medicines, I'd probably just base*  
24  
25 *my choice - based on my experience.*  
26  
27  
28  
29  
30  
31

## 32 **DISCUSSION**

### 33 **Statement of Principal Findings**

34  
35  
36  
37  
38  
39  
40  
41  
42  
43  
44  
45  
46  
47  
48  
49  
50  
51  
52  
53  
54  
55  
56  
57  
58  
59  
60  
Quality was conceptualised as multi-dimensional with inter-related overarching themes of person-centeredness, professionalism, and privacy. The importance of relational aspects with pharmacy personnel was emphasised. Participants valued a professional approach including staff behaviour and appearance. Pharmacy design influenced perceptions of privacy, including having sufficient space or a separate consultation room to promote private and confidential consultations with a pharmacist.

Participants suggested that quality assurance would “drive up quality standards overall” and inspire confidence in the public, but they intimated that quality ratings were unlikely to

1  
2  
3 influence their use of specific pharmacies. They emphasised the need for multi-dimensional  
4  
5 quality ratings and for transparency with their derivation.  
6  
7  
8  
9

### 10 **Strengths and Weaknesses**

11  
12 We included a diverse range of participants in terms of country, sex, and age, but not  
13  
14 ethnicity. We were satisfied that our sample size was appropriate in terms of answering our  
15  
16 research questions relating to the conceptualisation of quality and its measurement.[22] One  
17  
18 experienced health service researcher, who was also a pharmacist (MW), undertook all data  
19  
20 collection. She did not disclose her pharmacist background unless specifically asked. The  
21  
22 breadth and depth of topics covered suggests that participants felt empowered to participate  
23  
24 and share positive and negative experiences of community pharmacy use. Data analysis was  
25  
26 undertaken by two experienced qualitative researchers (KS, female and RW, male) neither of  
27  
28 whom were pharmacists. This ensured a balanced approach to the analysis and  
29  
30 interpretation of the data. Our interpretive analysis explored participants' understanding and  
31  
32 sense-making of their experiences of pharmacy services. We are confident that all key  
33  
34 recurring themes were identified with no new themes emerging in the later interviews or  
35  
36 focus groups.  
37  
38  
39  
40  
41  
42  
43  
44  
45  
46

### 47 **Important Differences in the results**

48  
49 None of the major themes derived from our study are reflected in the national quality  
50  
51 indicators. This is perhaps unsurprising given that there was no patient and public  
52  
53 involvement (PPI) with indicator development. To date, there has been minimal PPI in the  
54  
55 development of the few existing quality indicators for community pharmacy  
56  
57 services.[23,24,25] There has, however, been limited exploration of the likely influence of  
58  
59  
60

1  
2  
3 quality ratings on patient behaviour. Our participants anticipated that quality indicators  
4  
5 would have little effect on their use of pharmacies, reflecting the results of two US studies  
6  
7 that concurred that patients would only consider indicators if they were seeking a community  
8  
9 pharmacy in a new area[26,27].  
10  
11  
12  
13  
14

### 15 **Meaning of the study**

16  
17 Our results show that the public value relational aspects of care i.e. personnel who are  
18  
19 friendly and approachable, and reflect a recent UK-wide survey of over 1000 members of the  
20  
21 public and their preferences for attributes of community pharmacies when seeking care for  
22  
23 minor ailments (aka self-care consultations).[28] As with these survey respondents, our  
24  
25 participants also prioritised ease of access and convenience as important attributes.  
26  
27  
28  
29  
30  
31

### 32 **Implications for clinicians and policymakers; and unanswered questions and future** 33 **research.**

34  
35 Future quality indicators should involve stakeholders, particularly patients and public, as the  
36  
37 main users of community pharmacy. Despite a possible lack of effect on care-seeking  
38  
39 behaviour, the use of co-produced indicators *could* be used to drive quality improvement  
40  
41 within and between community pharmacies.  
42  
43  
44  
45  
46  
47  
48  
49

### 50 **CONCLUSION**

51  
52 The public conceptualise quality of community pharmacy services as multidimensional and  
53  
54 they value relational aspects of care provided by personnel in this setting. Whilst the  
55  
56 development and application of quality indicators may drive improvement, it seems unlikely  
57  
58 that they would influence the public's use of individual pharmacies.  
59  
60

## ACKNOWLEDGEMENTS

We thank all the members of the public who participated in interviews and focus groups as well as the organisations and individuals who facilitated recruitment of participants for this study.

## FUNDING

This work was supported by the Health Foundation with Professor Watson's Improvement Science Fellowship.

## COMPETING INTERESTS

None declared.

## AUTHOR CONTRIBUTIONS

MW led the scientific development and interpretation of the study, conducted most of the data collection, and led manuscript production and revisions.

KS advised on and developed analytical tools and frameworks, and contributed towards data analysis and interpretation, manuscript production and revisions.

RW contributed towards data analysis and interpretation, manuscript production and revisions.

## DATA SHARING

No additional data are available. All data related to this study are included in this submission, either in tables in the manuscript or in supplementary files.



1  
2  
3  
4  
5  
6  
7  
8  
9  
10  
11  
12  
13  
14  
15  
16  
17  
18  
19  
20  
21  
22  
23  
24  
25  
26  
27  
28  
29  
30  
31  
32  
33  
34  
35  
36  
37  
38  
39  
40  
41  
42  
43  
44  
45  
46  
47  
48  
49  
50  
51  
52  
53  
54  
55  
56  
57  
58  
59  
60

For peer review only

## References

- 1 Fielding S, Porteous T, Ferguson J, *et al.* The burden of minor ailment consultations in general practice and emergency departments. *Fam Pract* 2015;32:165-172. doi: 10.1093/fampra/cmz003
- 2 Watson MC, Ferguson J, Barton GR, *et al.* A comparison of health- and cost-related outcomes for patients presenting with similar symptoms in community pharmacies, general practices and emergency departments: A cohort study. *BMJ Open* 2015;5:e006261 doi:10.1136/bmjopen-2014-006261
- 3 NHS Digital (National Statistics). General Pharmaceutical Services in England 2007/2008 to 2016/2017 <https://digital.nhs.uk/data-and-information/publications/statistical/general-pharmaceutical-services/general-pharmaceutical-services-england-2007-08-to-2016-17#key-facts>. Accessed 23/07/18
- 4 Worldometer: UK Population (live). <http://www.worldometers.info/world-population/uk-population>. Accessed 23/07/18
- 5 Todd A, Copeland A, Husband A, *et al.* The positive pharmacy care law: an area-level analysis of the relationship between community pharmacy distribution, urbanity and social deprivation in England. *BMJ Open* 2014;4:e005764. doi:10.1136/bmjopen-2014-005764

1  
2  
3  
4 6 NHS England. Transforming urgent and emergency care services in England. Urgent and  
5  
6 emergency care review end of phase 1 report. Appendix 1—Revised evidence base from the  
7  
8 urgent and emergency care review. The Urgent and Emergency Care Review. NHS, London;  
9  
10 2013.  
11  
12

13  
14  
15  
16 7 NHS Choices: NHS services explained.

17  
18  
19 <https://www.nhs.uk/NHSEngland/AboutNHSservices/Pages/NHSServices.aspx>

20  
21 Accessed 23/07/18  
22  
23

24  
25  
26 8 NHS Scotland: Know who to turn to. <http://knowwhototurnto.org> Accessed 23/07/18  
27  
28

29  
30 9 Pearl J. Are some pharmacies failing? WHICH? 2013(June 2013):26  
31  
32

33  
34  
35 10 Studman A. Three in 10 pharmacies not following safety guidelines, finds Which?

36  
37 investigation. Which? 2018 (February): <https://www.which.co.uk/news/2018/02/three-in->

38  
39 [10-pharmacies-not-following-safety-guidelines-finds-which-investigation](https://www.which.co.uk/news/2018/02/three-in-10-pharmacies-not-following-safety-guidelines-finds-which-investigation) Accessed 23/07/18  
40  
41  
42

43  
44  
45 11 Inch J, Porteous T, Maskrey V, *et al*. It's not what you do it's the way that it's measured:

46  
47 Quality assessment of minor ailment management in community pharmacies. *Int J Pharm*

48  
49 *Pract*. 2016: DOI: 10.1111/ijpp.12305  
50  
51  
52  
53  
54  
55  
56  
57  
58  
59  
60

1  
2  
3  
4 12 NHS England. Pharmacy Quality Payments: Quality Criteria Guidance. 2017.

5  
6 <https://www.england.nhs.uk/wp-content/uploads/2017/02/quality-payments-quality->  
7  
8 [criteria-guidance-1.pdf](https://www.england.nhs.uk/wp-content/uploads/2017/02/quality-payments-quality-criteria-guidance-1.pdf) Accessed 23/07/18

9  
10  
11  
12  
13  
14 13 Watson MC, Skea Z. Jugglers and tightrope walkers: The challenge of delivering quality  
15  
16 community pharmacy services. *PLoS ONE* 13(7): e0200610.

17  
18  
19 doi:10.1371/journal.pone.0200610

20  
21  
22  
23  
24 14 Health and Social Care Alliance Scotland. <https://www.alliance-scotland.org.uk/>

25  
26 Accessed 23/07/18

27  
28  
29  
30  
31 15 Bowling A. *Research Methods in Health Care*. Open University Press, Buckingham. 2002

32  
33  
34  
35  
36 16 Bowie P, McNab D, Ferguson J, *et al*. Quality improvement and person-centredness: A  
37  
38 participatory mixed methods study to develop the 'always event' concept for primary care.

39  
40  
41 *BMJ Open* 2015;5:e006667. doi: 10.1136/bmjopen-2014-006667doi: 10.1136/bmjopen-  
42  
43 2014-006667

44  
45  
46  
47  
48 17 Institute for Healthcare Improvement: Always Events Toolkit.

49  
50 <http://www.ihl.org/resources/Pages/Tools/Always-Events-Toolkit.aspx> Accessed 23/07/18

51  
52  
53  
54  
55 18 Attride-Stirling J. Thematic networks: an analytic tool for qualitative research. *Qualitative*  
56  
57 *research*. 2001;1(3):385-405

1  
2  
3  
4  
5  
6  
7 19 Braun V, Clarke V. Using thematic analysis in psychology. *Qualitative research in*  
8  
9 *psychology*. 2006;3(2):77-101  
10

11  
12  
13  
14 20 Ritchie J, Spencer L, O'Connor W. Carrying out qualitative analysis. *Qualitative research*  
15  
16 *practice: A guide for social science students and researchers*. 2003;1  
17  
18

19  
20  
21 21 Tong A, Sainsbury P, Craig J. Consolidated criteria for reporting qualitative research  
22  
23 (COREQ): A 32-item checklist for interviews and focus groups. *Int J Qual Health Care*.  
24  
25 2007;19(6):349–357. pmid:17872937  
26  
27

28  
29  
30 22 Marshall MN. Sampling for qualitative research. *Fam Pract* 1996;13:522-25  
31

32  
33  
34 23 Halsall D, Noyce PR, Ashcroft DM. Characterizing healthcare quality in the community  
35  
36 *pharmacy setting: Insights from a focus group study*. *Res Soc Admin Pharm*. 2012;8(5):360-  
37  
38 370  
39  
40

41  
42  
43  
44 24 Grey E, Harris M, Rodham K, Weiss MC. Characteristics of good quality pharmaceutical  
45  
46 *services common to community pharmacies and dispensing general practices*. *Int J Pharm*  
47  
48 *Pract*. 2016;24(5):311-318  
49  
50

51  
52  
53  
54 25 Blalock SJ, Keller S, Nau D, et al. Development of the consumer assessment of pharmacy  
55  
56 *services survey*. *J Am Pharm Assoc* 201;52:324-332.  
57  
58  
59  
60

1  
2  
3  
4 26 Shiyabola OO, Mort JR. Patients' perceived value of pharmacy quality measures: A  
5  
6 mixed-methods study. *BMJ Open*. 2015;5(1). doi: 10.1136/bmjopen-2014-006086  
7  
8  
9

10  
11 27 Warholak TL, Patel M, Rosenthal M, West-Strum D, Ettienne EB, Nunlee-Bland G, et al.  
12  
13 Patient perceptions of a pharmacy star rating model *J Am Pharm Assoc* (2003). 2017 May -  
14  
15 Jun;57(3):311-317. doi: 10.1016/j.japh.2017.01.011.  
16  
17  
18  
19

20  
21  
22  
23 28 Porteous T, Ryan M, Bond C, *et al*. Managing Minor Ailments; The Public's Preferences  
24  
25 for Attributes of Community Pharmacies. A Discrete Choice Experiment. *PLoS ONE* 11(3):  
26  
27 e0152257. Doi:10.1371/journal.pone.0152257  
28  
29  
30  
31  
32  
33  
34  
35  
36  
37  
38  
39  
40  
41  
42  
43  
44  
45  
46  
47  
48  
49  
50  
51  
52  
53  
54  
55  
56  
57  
58  
59  
60

**Manuscript:** How does the public conceptualise the quality of care and its measurement in community pharmacies in the United Kingdom?: A qualitative interview study

### Consolidated criteria for reporting qualitative studies (COREQ): 32-item checklist

Developed from:

Tong A, Sainsbury P, Craig J. Consolidated criteria for reporting qualitative research (COREQ): a 32-item checklist for interviews and focus groups. *International Journal for Quality in Health Care*. 2007. Volume 19, Number 6: pp. 349 – 357

| No. Item                                       | Guide questions/description                                                                              |                                                                                                                                                  | Reported on Page # |
|------------------------------------------------|----------------------------------------------------------------------------------------------------------|--------------------------------------------------------------------------------------------------------------------------------------------------|--------------------|
| <b>Domain 1: Research team and reflexivity</b> |                                                                                                          |                                                                                                                                                  |                    |
| <i>Personal Characteristics</i>                |                                                                                                          |                                                                                                                                                  |                    |
| 1. Interviewer/facilitator                     | Which author/s conducted the interview or focus group?                                                   | MW                                                                                                                                               | 4,6,19             |
| 2. Credentials                                 | What were the researcher's credentials?<br>E.g. PhD, MD                                                  | PhD                                                                                                                                              | 1                  |
| 3. Occupation                                  | What was their occupation at the time of the study?                                                      | Professor,<br>Department of<br>Pharmacy and<br>Pharmacology                                                                                      | 1                  |
| 4. Gender                                      | Was the researcher male or female?                                                                       | Female                                                                                                                                           | 6                  |
| 5. Experience and training                     | What experience or training did the researcher have?                                                     | Over 20 years' experience of health services research.                                                                                           | 6                  |
| <i>Relationship with participants</i>          |                                                                                                          |                                                                                                                                                  |                    |
| 6. Relationship established                    | Was a relationship established prior to study commencement?                                              | No                                                                                                                                               | -                  |
| 7. Participant knowledge of the interviewer    | What did the participants know about the researcher? e.g. personal goals, reasons for doing the research | Participants were briefed on the purpose of the study and understood that it was a research project being undertaken by MW. Ethical approval had | 6,7                |

|                                          |                                                                                                                                                          |                                                                                                                                                                                                  |     |
|------------------------------------------|----------------------------------------------------------------------------------------------------------------------------------------------------------|--------------------------------------------------------------------------------------------------------------------------------------------------------------------------------------------------|-----|
|                                          |                                                                                                                                                          | been granted, participants reviewed the participant information documentation prior to giving their written informed consent.                                                                    |     |
| 8. Interviewer characteristics           | What characteristics were reported about the interviewer/facilitator? e.g. Bias, assumptions, reasons and interests in the research topic                | MW is a registered pharmacist, which was a potential source of bias. However, MW did not disclose her background unless specifically asked. No other interviewer-related biases were identified. | 19  |
| <b>Domain 2: study design</b>            |                                                                                                                                                          |                                                                                                                                                                                                  |     |
| <i>Theoretical framework</i>             |                                                                                                                                                          |                                                                                                                                                                                                  |     |
| 9. Methodological orientation and Theory | What methodological orientation was stated to underpin the study? e.g. grounded theory, discourse analysis, ethnography, phenomenology, content analysis | Open coding with thematic analysis followed by a framework approach to support the systematic analysis of data around the research questions.                                                    | 7-8 |
| <i>Participant selection</i>             |                                                                                                                                                          |                                                                                                                                                                                                  |     |
| 10. Sampling                             | How were participants selected? e.g. purposive, convenience, consecutive, snowball                                                                       | Recruited via email using existing research networks, community groups, and personal networks. A maximum variation sample was recruited using a combination of purposive,                        | 6   |



|                                  |                                                                                   |                                                                                                                                                                                                                 |                 |
|----------------------------------|-----------------------------------------------------------------------------------|-----------------------------------------------------------------------------------------------------------------------------------------------------------------------------------------------------------------|-----------------|
|                                  |                                                                                   | convenience, and snowballing techniques.                                                                                                                                                                        |                 |
| 11. Method of approach           | How were participants approached? e.g. face-to-face, telephone, mail, email       | Email                                                                                                                                                                                                           | 6               |
| 12. Sample size                  | How many participants were in the study?                                          | 20                                                                                                                                                                                                              | 9               |
| 13. Non-participation            | How many people refused to participate or dropped out? Reasons?                   | No participants who agreed to take part in the study subsequently refused to participate, withdrew their consent, or dropped out.                                                                               | -               |
| <i>Setting</i>                   |                                                                                   |                                                                                                                                                                                                                 |                 |
| 14. Setting of data collection   | Where was the data collected? e.g. home, clinic, workplace                        | Data were collected via telephone or face-to-face in a non-clinical setting.                                                                                                                                    | 6               |
| 15. Presence of non-participants | Was anyone else present besides the participants and researchers?                 | No.                                                                                                                                                                                                             | 6               |
| 16. Description of sample        | What are the important characteristics of the sample? e.g. demographic data, date | Age range 20-79; 5 males, 15 females. Data was collected between August 2016 and July 2017.                                                                                                                     | 6, 10 (Table 1) |
| <i>Data collection</i>           |                                                                                   |                                                                                                                                                                                                                 |                 |
| 17. Interview guide              | Were questions, prompts, guides provided by the authors? Was it pilot tested?     | Interviews / focus groups were semi-structured using a topic guide. It was not piloted, but was modified throughout the data collection process to incorporate relevant topics identified in earlier interviews | 6-7             |

|                                        |                                                                          |                                                                                                                        |     |
|----------------------------------------|--------------------------------------------------------------------------|------------------------------------------------------------------------------------------------------------------------|-----|
|                                        |                                                                          | and focus groups.                                                                                                      |     |
| 18. Repeat interviews                  | Were repeat interviews carried out? If yes, how many?                    | No                                                                                                                     | -   |
| 19. Audio/visual recording             | Did the research use audio or visual recording to collect the data?      | Yes. Interviews / focus groups were recorded using an audio recorder.                                                  | 6   |
| 20. Field notes                        | Were field notes made during and/or after the interview or focus group?  | No additional notes were made.                                                                                         | -   |
| 21. Duration                           | What was the duration of the interviews or focus group?                  | The semi-structured interviews / focus groups lasted an average of 51 minutes (range 31 to 74 minutes).                | 6   |
| 22. Data saturation                    | Was data saturation discussed?                                           | Yes. Recruitment ceased once theoretical saturation was reached (i.e. when no new themes were emerging from the data). | 6   |
| 23. Transcripts returned               | Were transcripts returned to participants for comment and/or correction? | No.                                                                                                                    | -   |
| <b>Domain 3: analysis and findings</b> |                                                                          |                                                                                                                        |     |
| <i>Data analysis</i>                   |                                                                          |                                                                                                                        |     |
| 24. Number of data coders              | How many data coders coded the data?                                     | Two.                                                                                                                   | 7,8 |
| 25. Description of the coding tree     | Did authors provide a description of the coding tree?                    | Coding described in methods section.                                                                                   | 7-8 |
| 26. Derivation of themes               | Were themes identified in advance or derived from the data?              | Themes were derived from the data.                                                                                     | 7-8 |
| 27. Software                           | What software, if applicable, was used to manage the data?               | Nvivo.                                                                                                                 | 7-8 |

|                                  |                                                                                                                                 |                                                                                               |       |
|----------------------------------|---------------------------------------------------------------------------------------------------------------------------------|-----------------------------------------------------------------------------------------------|-------|
| 28. Participant checking         | Did participants provide feedback on the findings?                                                                              | No.                                                                                           | -     |
| <i>Reporting</i>                 |                                                                                                                                 |                                                                                               |       |
| 29. Quotations presented         | Were participant quotations presented to illustrate the themes/findings? Was each quotation identified? e.g. participant number | Yes, themes/findings were supported with direct quotes attributed to anonymised participants. | 10-18 |
| 30. Data and findings consistent | Was there consistency between the data presented and the findings?                                                              | Yes.                                                                                          | 10-18 |
| 31. Clarity of major themes      | Were major themes clearly presented in the findings?                                                                            | Yes.                                                                                          | 10-18 |
| 32. Clarity of minor themes      | Is there a description of diverse cases or discussion of minor themes?                                                          | No.                                                                                           | N/A   |

# BMJ Open

## How does the public conceptualise the quality of care and its measurement in community pharmacies in the United Kingdom? A qualitative interview study

|                                 |                                                                                                                                                                                                                                                |
|---------------------------------|------------------------------------------------------------------------------------------------------------------------------------------------------------------------------------------------------------------------------------------------|
| Journal:                        | <i>BMJ Open</i>                                                                                                                                                                                                                                |
| Manuscript ID                   | bmjopen-2018-027198.R2                                                                                                                                                                                                                         |
| Article Type:                   | Research                                                                                                                                                                                                                                       |
| Date Submitted by the Author:   | 12-Feb-2019                                                                                                                                                                                                                                    |
| Complete List of Authors:       | Watson, Margaret; University of Bath, Department of Pharmacy and Pharmacology<br>Silver, Karin; University of Bath, Department of Pharmacy and Pharmacology<br>Watkins, Ross; University of Bristol Medical School, Population Health Sciences |
| <b>Primary Subject Heading</b>: | Health services research                                                                                                                                                                                                                       |
| Secondary Subject Heading:      | Pharmacology and therapeutics, Qualitative research                                                                                                                                                                                            |
| Keywords:                       | Quality in health care < HEALTH SERVICES ADMINISTRATION & MANAGEMENT, Organisation of health services < HEALTH SERVICES ADMINISTRATION & MANAGEMENT, PUBLIC HEALTH, QUALITATIVE RESEARCH                                                       |
|                                 |                                                                                                                                                                                                                                                |

SCHOLARONE™  
Manuscripts

1  
2  
3 How does the public conceptualise the quality of care and its measurement in community  
4 pharmacies in the United Kingdom? A qualitative interview study  
5  
6  
7  
8  
9

10 <sup>1</sup>Watson M\*, <sup>1</sup>Silver K, <sup>2</sup>Watkins R.  
11  
12  
13

14 <sup>1</sup>Department of Pharmacy and Pharmacology, University of Bath  
15

16 <sup>2</sup>School of Social and Community Medicine, University of Bristol  
17  
18  
19

20 \*Corresponding author  
21

22 Professor Margaret C Watson  
23

24 Department of Pharmacy and Pharmacology, University of Bath, Bath, England, BA2 7AY.  
25

26 Email: [m.c.watson@bath.ac.uk](mailto:m.c.watson@bath.ac.uk) Telephone: 01225 386787  
27  
28

29 Ms Karin Silver  
30

31 Department of Pharmacy and Pharmacology, University of Bath, Bath, England, BA2 7AY.  
32

33 Dr Ross Watkins  
34

35 School of Social and Community Medicine, University of Bristol, Bristol, England, BS8 2PS.  
36  
37  
38  
39

40 Keywords:  
41

42 Community pharmacy services; Quality of Health Care; Quality Improvement; Qualitative  
43 Research  
44  
45  
46  
47  
48  
49  
50  
51  
52  
53  
54  
55  
56  
57  
58  
59  
60

## ABSTRACT

### Objectives

This study explored citizens' perspectives about the quality of community pharmacy services in the United Kingdom (UK) and whether and how the quality of community pharmacy services should be measured.

### Design

Semi-structured interviews and focus groups were conducted and were audio-recorded, transcribed and analysed systematically using an interpretive approach.

### Participants

Members of the public were approached via networks, such as Health and Social Care Alliance Scotland, as well as community groups and personal networks.

### Setting

Scotland, England and Wales.

### Results

Data were collected from 20 participants: 11 interviews and two focus groups (in community settings, with five and four participants). Quality was conceptualised as multi-dimensional with inter-related overarching themes of person-centeredness, professionalism, and privacy. The importance of relational aspects with pharmacy personnel was emphasised including the need for a "friendly" caring service, continuity of care, being known to personnel, including their awareness of individual's health conditions: *"it's quite a personal service I would say...I think it means that they care about your welfare"*. Participants discussed the importance of a professional approach to customer interactions including staff behaviour and appearance. Pharmacy design influenced perceptions of privacy, including having sufficient space or a separate consultation room to promote confidential consultations with a pharmacist.

1  
2  
3 Participants suggested that quality assurance is needed to improve quality and to inspire  
4 confidence in the public “*it would drive up quality standards overall*” but suggested that  
5  
6  
7  
8 quality ratings were unlikely to influence their use of specific pharmacies. They emphasised  
9  
10 the need for multi-dimensional quality ratings and for transparency with their derivation.  
11  
12  
13  
14

## 15 Conclusions

16  
17 The public conceptualise quality of community pharmacy services as multidimensional and  
18 value relational aspects of care provided by personnel in this setting. Whilst the development  
19 and application of quality indicators may drive improvement, it seems unlikely to influence  
20 the public’s use of individual pharmacies.  
21  
22  
23  
24  
25  
26  
27  
28  
29

## 30 Article Summary

31  
32 Strengths and Limitations – 5 bullets re methods, not results  
33

- 34 • a diverse range of individuals participated in terms of age, sex, and country but not  
35 ethnicity  
36
- 37 • data collection was undertaken by one experienced health service researcher who was  
38 also a pharmacist  
39
- 40 • data analysis was undertaken by two experienced qualitative researchers neither of  
41 whom were pharmacists. This ensured a balanced approach to the analysis and  
42 interpretation of the data.  
43
- 44 • all key recurring themes were identified with no new themes emerging in later  
45 interviews or focus groups.  
46  
47  
48  
49  
50  
51  
52  
53  
54  
55  
56  
57  
58  
59  
60

## INTRODUCTION

Each year in the United Kingdom (UK), an estimated 650,000 emergency department (ED) consultations and 18 million general practitioner (GP) consultations are for conditions (hereafter referred to as self-care consultations) that can be treated effectively by community pharmacy personnel, equating to around £1.1 billion in resources.[1, 2] In England, each of the 11699 community pharmacies [3] serves an average population of around 5600 citizens [4] of whom an estimated 89% are within 20 minutes' walk of a community pharmacy.[5] National policies and resources recommend the public to seek care from the most 'appropriate' provider.[6,7,8] Reassurance is needed regarding the quality of care provided in community pharmacies in general, and more specifically for self-care, which has been shown to vary, depending upon the criteria used.[9,10,11] Whilst national quality indicators for community pharmacy were introduced in England in 2017 [12], none refer to the management of self-care consultations despite this service being regarded the 'shop window' of community pharmacy.[13] As such, the study presented here is part of a research programme to co-produce quality indicators for self-care consultations.

The aim of this study was to conceptualise public perceptions and beliefs about the:

- quality of community pharmacy services in general
- management of self-care consultations
- measurement of the quality of community pharmacy services



## **METHODS**

### **Study Design**

Interviews and focus groups were conducted with members of the public with the method used varying according to participant availability and preference.

### **Recruitment, sampling, and consent**

Participants were recruited through existing networks such as Health and Social Care Alliance Scotland,[14] as well as community groups and personal networks. Individuals were eligible to participate if they used community pharmacy services, and understood and were able to communicate in English. An email was sent to potential participants with information about the study, advising them to contact the research team if they wished to participate. Recruitment ceased once theoretical saturation was reached (i.e. when no new themes were emerging from the data). A maximum variation sample was recruited using a combination of purposive, convenience, and snowballing techniques.[15]

### **Data Collection**

One female researcher (MW), who is a registered pharmacist with over 20 years' experience of health services research, undertook all data collection. Audio-recorded face-to-face or telephone interviews were conducted between August 2016 and July 2017, and lasted an average of 51 minutes (range 31 to 74 minutes). No other individuals were present during the interviews or focus groups. The topic (interview) guide was informed by existing work on quality and quality improvement, as well as a precedent interview study involving pharmacists.[13] It was not piloted prior to use but was modified throughout the data collection process to incorporate relevant topics identified in earlier interviews and focus

1  
2  
3 groups. This is consistent with an inductive approach in which theory emerges iteratively and  
4  
5 develops through the analysis of data. The concepts of “what matters to you”, “always  
6  
7 events” and “never events” were included.[13,16] Always events are “aspects of the patient  
8  
9 experience that are so important to patients and families that health care providers must aim  
10  
11 to perform them consistently and reliably for every patient, every time”.[17]  
12  
13  
14  
15  
16

17  
18 Quality measurement was explored in general terms and more specifically in relation to the  
19  
20 use of rating or accreditation systems. The same topic guide was used for interviews and focus  
21  
22 groups. As new issues or themes emerged, they were included in subsequent  
23  
24 interviews/focus groups. All participants provided written consent to participate. On  
25  
26 completion of the interviews/focus groups, participants were offered a ‘thank you’ voucher  
27  
28 worth £20.  
29  
30  
31  
32  
33  
34

### 35 **Data Analysis**

36  
37 Audio-recordings were transcribed verbatim by an experienced transcriber and accuracy  
38  
39 checked (KS/RW). The data were analysed systematically using Thematic Analysis.[18,19] The  
40  
41 focus of the analysis was to organise the data in a meaningful way according to the *a priori*  
42  
43 aims of the study, as well as to allow for the identification of topics and issues of importance  
44  
45 to participants. NVivo 11 (QSR International) was used to help organise, code and explore the  
46  
47 data. Two researchers (KS, RW) first familiarised themselves with the transcripts and coded  
48  
49 to broad topic areas (structuring codes). The next (extensive and iterative) phase involved the  
50  
51 identification of themes and sub-themes to reflect the research questions (a priori  
52  
53 codes/nodes) and from within the data itself (in vivo codes/nodes). As the analysis  
54  
55  
56  
57  
58  
59  
60

1  
2  
3 progressed, conceptual and crosscutting themes were identified and coded, in addition to  
4 relevant topic codes.  
5  
6

7  
8 Each transcript was coded by one researcher (KS or RW), with most coded by two researchers  
9 (KS, RW) to ensure reliability. The themes, their names and explanations were continually  
10 refined through discussion between the researchers to ensure that they were distinct from  
11 other themes, internally coherent and consistently applied. The coded data were explored  
12 through queries and other NVivo tools, and themes were mapped to identify connections.  
13  
14 Once coding was complete, a Framework approach [20] was used to support the systematic  
15 analysis of data around the research questions, to enable an assessment of prevalence and  
16 coverage of key themes (i.e. dimensions of quality). Further interpretation and discussion, to  
17 ensure that analytical claims were congruent with the extracts, culminated in the creation of  
18 a thematic resource document. This reported all the relevant coded data under overarching  
19 themes/headings, with some extracts being duplicated under two or more themes (e.g. in the  
20 case of richness or complexity). This study is reported in accordance with COREQ [21].  
21  
22  
23  
24  
25  
26  
27  
28  
29  
30  
31  
32  
33  
34  
35  
36  
37  
38  
39

#### 40 **Consent and Ethical Review**

41  
42 The University of Aberdeen College Ethics Review Board provided ethical review and approval  
43 for the study (CERB/2015/6/1208).  
44  
45  
46  
47  
48

#### 49 **PATIENT AND PUBLIC INVOLVEMENT STATEMENT**

50  
51 We did not involve PPI representatives in the development of the research questions and  
52 outcome measures or in the design of the study. However, patients and the public were  
53 recruited through: the Scottish Patient Alliance; two participants in England were recruited  
54 through patient and public involvement (PPI) groups; and the English and Welsh focus group  
55  
56  
57  
58  
59  
60

1  
2  
3 participants were recruited through professional contacts of the researchers. Study results  
4  
5 will be disseminated to all participants who expressed an interest in being informed of the  
6  
7 results using a plain language summary that will be sent via email or in the post. All  
8  
9 participants were thanked in the acknowledgements.  
10  
11  
12  
13  
14  
15  
16  
17  
18  
19  
20  
21  
22  
23  
24  
25  
26  
27  
28  
29  
30  
31  
32  
33  
34  
35  
36  
37  
38  
39  
40  
41  
42  
43  
44  
45  
46  
47  
48  
49  
50  
51  
52  
53  
54  
55  
56  
57  
58  
59  
60

For peer review only

## RESULTS

In total, 20 individuals participated (Scotland (n=7) all interviewed individually; England (one focus group (n=4) and four individual interviews (one of which was face-to-face)); and Wales (one focus group (n=5)) (Table 1). The majority were British and female. Four participants had been employed previously in health-related employment (none reported pharmacy-related employment although one male sometimes worked as a delivery driver for a local pharmacy). The focus group in England comprised four women in their 30s, all parents of young children. The focus group in Wales comprised three women in their 40s and 50s who were all mothers, and two graduate students in their 20s. All seven participants in Scotland were recruited through the Scottish Patient Alliance, two participants in England were recruited through patient and public involvement (PPI) groups, and the English and Welsh focus group participants were recruited through professional contacts of the researchers (MW, RW).

Table 1 Participant characteristics

| Identifier | Country  | Ethnicity      | M/F | Range | Healthcare background |
|------------|----------|----------------|-----|-------|-----------------------|
| I1         | Scotland | White Scottish | F   | 50-59 | NS                    |
| I2         | Scotland | Irish          | F   | 60-69 | Yes (retired)         |
| I3         | Scotland | White Scottish | F   | 40-49 | NS                    |
| I4         | Scotland | White Scottish | F   | 20-29 | No                    |
| I5         | Scotland | White British  | F   | 50-59 | NS                    |
| I6         | Scotland | White          | M   | 70-79 | No                    |
| I7         | Scotland | British        | M   | 70-79 | Yes                   |
| I8         | England  | White British  | F   | 70-79 | Yes                   |
| I9         | England  | White British  | M   | 60-69 | No                    |
| I10        | England  | British        | M   | 70-79 | No                    |
| I11        | England  | White          | F   | 50-59 | No                    |
| F1_1       | England  | British        | F   | 30-39 | No                    |
| F1_2       | England  | British        | F   | 30-39 | No                    |
| F1_3       | England  | White British  | F   | 30-39 | No                    |
| F1_4       | England  | British        | F   | 30-39 | No                    |
| F2_1       | Wales    | British        | F   | 50-59 | No                    |
| F2_2       | Wales    | White European | F   | 20-29 | No                    |
| F2_3       | Wales    | White British  | M   | 20-29 | No                    |
| F2_4       | Wales    | NS             | F   | 40-49 | No                    |
| F2_5       | Wales    | White British  | F   | 40-49 | Yes                   |

I Interview F Focus Group NS Not stated

### Dimensions of Quality: The three P's.

When asked “*what matters to you*”, participants conceptualised the quality of community pharmacies as multi-dimensional and inter-related with three over-arching themes: person-centeredness; professionalism; and privacy. Selected quotes are presented to illustrate these dimensions and themes (Identifiers I and F denote interview and focus group participants, respectively).

1  
2  
3 Person-centeredness  
4

5 Participants emphasised the importance of relational aspects with pharmacy personnel  
6 including the need for a “friendly” caring service, continuity of care, and the staff ‘knowing’,  
7  
8 the individual, including awareness of their health conditions.  
9  
10  
11  
12  
13  
14

15 *I4: The staff are really friendly, and helpful, ... , it's quite a personal service I would*  
16 *say...I think it means that they care about your welfare.*  
17

18  
19  
20  
21  
22 *I8: I like continuity... It makes me feel safer, and um...it's like your doctor, you want*  
23 *your doctor to know you.. it's nice to think that this person knows you and might*  
24 *actually take an interest in you as opposed to you're just the next customer.*  
25  
26  
27  
28  
29  
30  
31

32 They generally wanted easy access to a pharmacist and pharmacies in terms of geographical  
33 proximity and location, as well as opening hours, which suited their needs and lifestyle, and  
34 suitable parking or access by public transport. However, others were willing to travel further  
35 for specific medication needs, or a better service.  
36  
37  
38  
39  
40  
41  
42  
43  
44

45 Some also wanted the pharmacist to be visible and accessible in the pharmacy.  
46  
47  
48  
49

50 *I9: ..direct access, easy access to the pharmacist (...) because there are some*  
51 *pharmacists [sic] you go to where the registered pharmacists is like someone hiding*  
52 *behind...a curtain and you don't see them.*  
53  
54  
55  
56  
57  
58  
59  
60

1  
2  
3 *F1\_1: They [counter staff] are the gatekeepers aren't they? ..the pharmacist is in the*  
4 *back, somewhere you know? It does feel like you have to have something really*  
5 *legitimate to speak to them rather than them being available to speak to you (...). I*  
6 *don't know the rules. I would like to know the answer to that – when am I entitled to*  
7 *speak to the pharmacist?*  
8  
9  
10  
11  
12  
13  
14  
15  
16

17 Interviewees felt that staff should take time to listen and communicate clearly, involve people  
18 in decisions around their own treatment, be responsive to personal requirements and  
19 preferences, and be respectful of individual concerns.  
20  
21  
22  
23  
24  
25  
26

27 *I10: [there should always be] a feeling that the person you are talking to has time for*  
28 *you obviously. If you have the feeling that you are being a nuisance then you would be*  
29 *reluctant to ask a second time.*  
30  
31  
32  
33  
34  
35  
36

### 37 Professionalism

38  
39 Participants discussed the importance of a professional approach in customer interactions  
40 including staff behaviour and appearance. Although not all expected staff to wear a uniform,  
41 it was commonly felt that they should be identifiable, for example, by wearing name badges.  
42  
43  
44  
45  
46  
47  
48

49 *I11: The staff would look clean and smart and presentable and the name badge*  
50 *confirming that they are not just Saturday girls, they are kind of trained professionals.*  
51  
52  
53  
54  
55

56 *F1\_2: I guess maybe for them to tell you who they are - introduce themselves. 'I am a*  
57 *pharmacist' or - so that you know exactly who you're dealing with.*  
58  
59  
60



1  
2  
3 People expected staff (including, but not only, pharmacists) to be competent, suitably trained,  
4  
5 qualified and confident in their ability to diagnose, advise and prescribe, and for all staff to be  
6  
7 knowledgeable about over-the-counter (OTC) medication (i.e. medicines, which can be  
8  
9 sold/bought without the need for a prescription), and be able to provide (cheaper)  
10  
11 alternatives.  
12  
13  
14  
15  
16  
17

18 *F2\_3: If they are still uncertain they should always refer you back to your GP .*  
19  
20  
21

22  
23 *F1\_3: I don't know if it was the pharmacist or the pharmacy assistant to be honest*  
24  
25 *but she basically advised me to take a slightly cheaper model of the medicine... .. And*  
26  
27 *I really appreciated it, that's a nice thing to do.*  
28  
29  
30  
31

32 Counter staff were expected to defer to the pharmacist if necessary, who should then refer  
33  
34 onward as appropriate, but not be overly risk averse (a frustration for parents of young  
35  
36 children).  
37  
38  
39  
40  
41

42 *F1\_2: [I] went a few times when [name of child] was younger and then because I just*  
43  
44 *kept getting...'I don't know what's wrong with him, he's got like a bit of a rash, or*  
45  
46 *something, is there anything you can give me?' and they were like 'oh we wouldn't*  
47  
48 *like to say just go and see the GP'. Now .. I will go straight to the GP ..because ..they*  
49  
50 *don't ever seem keen to actually sort of [sic] not diagnose.*  
51  
52  
53  
54  
55  
56  
57  
58  
59  
60

1  
2  
3 Participants felt it was important that a pharmacy felt clean, light and “hygienic”. It was felt  
4  
5 that a good quality pharmacy should have sufficient medication stock so that prescriptions  
6  
7 could be fully filled, in a timely manner, to avoid return visits.  
8  
9

10  
11  
12  
13 *I6: it's got to be how quickly you receive whatever medicine or treatment you need ...*  
14  
15 *that's the most important thing.*  
16  
17

## 20 Privacy

21  
22 Privacy was an important consideration, and included physical characteristics of the  
23  
24 pharmacy in supporting privacy, with either a separate consultation room or a dedicated  
25  
26 private area, and the need to have confidential conversations with the pharmacist.  
27  
28  
29

30  
31  
32 *I2: private consultation room that's accessible. Not at the back of the shop (...) I don't*  
33  
34 *think there should be over the counter consultations at the same section where people*  
35  
36 *are coming to buy their cosmetics or whatever or pick up their prescriptions.. it should*  
37  
38 *be separate, in fact go into [supermarket pharmacy] you've got to queue up with*  
39  
40 *everybody that's wanting their fags, or wants a lottery ticket.*  
41  
42  
43  
44  
45

46  
47 Privacy was interwoven with confidentiality, which in turn, influenced confidence and trust in  
48  
49 pharmacy personnel.  
50  
51

52  
53  
54 *I11: ..they reassure you ..().you that it is a private consultation maybe and that your*  
55  
56 *data is protected as a minimum I suppose.*  
57  
58  
59  
60

1  
2  
3 *I5: We do have a village pharmacy, but because of the lack of confidentiality I am now*  
4 *taking myself a 52 mile round trip to get a prescription. ....() It matters that I feel*  
5 *confident in the service that I'm being given, that I'm confident in the fact that my*  
6 *information is being kept confidential, and that the fact is that the pharmacists on the*  
7 *whole genuinely are trying to do their best by patients.*

### 17 **Measuring Quality in Community Pharmacies**

18  
19  
20 Participants were asked whether the quality of community pharmacies should be measured  
21 and if so, what measures to use. Participants suggested that quality assurance is needed to  
22 improve quality as well as to inspire confidence in the public.

23  
24  
25  
26  
27  
28  
29  
30 *I5: ..the only way you're going to know that you're going to get a good service is to*  
31 *actually publish the fact that you are getting a good service. It's like in hospital wards*  
32 *for cleanliness, now they're putting up figures showing that they've managed to*  
33 *eliminate for the last 100 days - they've had no MRSA - that gives confidence to*  
34 *patients when they read that and see these facts and figures. And they're put out there*  
35 *for everybody to see not just the few, that's important.(...) .it would be about saying to*  
36 *the good pharmacists 'well done you're getting it right every time'. But it's also saying*  
37 *to the other ones 'you need to pull your socks up'.*

38  
39  
40  
41  
42  
43  
44  
45  
46  
47  
48  
49  
50  
51  
52 There was recognition that quality could be difficult to measure across varied services and  
53 discussion of which criteria to use.  
54  
55  
56  
57  
58  
59  
60

1  
2  
3 *F2\_4: How effective was the information or how accurate was the information you*  
4 *received, did it work for you, was it right or was it wrong or, how satisfied were you on*  
5 *what you were told, and I think that's it in a nutshell really.(...)*  
6  
7  
8  
9

10  
11  
12 Suggested methods of quality measurement included: customer satisfaction surveys/instant  
13 feedback; audit; mystery shoppers; and the use of professional standards. The use of rating  
14 systems was explored specifically. Participants identified similar systems associated with  
15 other aspects of life, including: shopping (Amazon); travel (Trip Advisor); restaurants (food  
16 hygiene ratings); health (hospital wards); and education services (Ofsted (Office for Standards  
17 in Education)). Many participants expressed broadly positive attitudes towards rating  
18 systems, whilst others questioned their usefulness based upon the use of similar systems  
19 applied to other areas e.g. education. The relevance of these systems to community  
20 pharmacies was also questioned due to the more complex, less “transactional” element of  
21 service/customer interaction.  
22  
23  
24  
25  
26  
27  
28  
29  
30  
31  
32  
33  
34  
35  
36  
37  
38  
39

40 *I9: There are ratings systems for things that - where a service can damage the public.*  
41 *..(.. we already have food safety ratings for cafes and restaurants. One might ask why*  
42 *we don't have one for something where the service could kill you more effectively, or*  
43 *more easily..(.. you can tell a reasonable restaurant or cafe from your first consumer*  
44 *experience, you won't necessarily know a really good pharmacy from a less than good*  
45 *pharmacy.*  
46  
47  
48  
49  
50  
51  
52  
53  
54  
55

56  
57 Participants described potential positive, negative and unintended consequences of a star-  
58 type rating system for reporting quality.  
59  
60

1  
2  
3 *I4: I think it would drive up quality standards overall. Yeah, I think it would be a good*  
4 *measure. If chemists know that they're being rated they obviously wouldn't want a bad*  
5 *rating.*  
6  
7  
8  
9

10  
11  
12  
13 *I8: .. I realise how frightened people are of their health...so I think if they went into a*  
14 *chemist shop and saw that maybe it only had 3 and room for improvement, I think*  
15 *they'd [the public] get nervous about that. So yes, there can be a rating but I don't*  
16 *think it really needs to be displayed when it comes to health.*  
17  
18  
19  
20  
21  
22  
23  
24

25 Some participants considered rating systems to be too subjective.  
26  
27  
28  
29

30 *F2\_1: .. if it was general public rating then I'd be a bit sceptical but if it came from a*  
31 *professional going in and give it an accredited, like the scores on the door, like it comes*  
32 *from a governing body ... then I would have more tendency to go with what they said,*  
33 *.. a non-biased organisation .. and you were judged (...) Maybe give it different*  
34 *categories, maybe the customer service side ask the general public, but as far as the*  
35 *professional - the accuracy of what was given out and the way everything was kept -*  
36 *leave that part to the professionals because I wouldn't be anyone to judge.*  
37  
38  
39  
40  
41  
42  
43  
44  
45  
46  
47  
48  
49

50 Most participants stated that they would take notice of star ratings if they existed, but  
51 wouldn't necessarily base their choice of pharmacy upon them. Some preferred to make their  
52 own judgement. For most, the decision to use a particular pharmacy was contingent on a  
53 number of, potentially overlapping, factors including accessibility, personal needs, time  
54 available and perceived urgency. Given that most also expressed general satisfaction with  
55  
56  
57  
58  
59  
60

1  
2  
3 the pharmacy they used, and some had no realistic choice of using another, there was some  
4  
5 scepticism around the value of a star ratings type system in terms of what it might be based  
6  
7 on and how it would be used.  
8  
9

10  
11  
12  
13 *F2\_2: It wouldn't affect my choice of the pharmacy unless it was maybe a one star out*  
14  
15 *of five then I'd be like well 'what's going on here like why' but if it was four or three I'd*  
16  
17 *probably wouldn't care because I probably wouldn't understand what the rating is*  
18  
19 *based on, who gave this rating to this particular pharmacy. I mean in restaurants I*  
20  
21 *know that if the hygiene -so I can imagine what it means - but in a pharmacy, but is it*  
22  
23 *the customer service, is it the way they organise their medicines, I'd probably just base*  
24  
25 *my choice - based on my experience.*  
26  
27  
28  
29  
30  
31

## 32 **DISCUSSION**

### 33 **Statement of Principal Findings**

34  
35  
36  
37  
38  
39  
40 Quality was conceptualised as multi-dimensional with inter-related overarching themes of  
41  
42 person-centeredness, professionalism, and privacy. The importance of relational aspects  
43  
44 with pharmacy personnel was emphasised. Participants valued a professional approach  
45  
46 including staff behaviour and appearance. Pharmacy design influenced perceptions of  
47  
48 privacy, including having sufficient space or a separate consultation room to promote private  
49  
50 and confidential consultations with a pharmacist.  
51  
52  
53  
54

55  
56  
57 Participants suggested that quality assurance would “drive up quality standards overall” and  
58  
59 inspire confidence in the public, but they intimated that quality ratings were unlikely to  
60

1  
2  
3 influence their use of specific pharmacies. They emphasised the need for multi-dimensional  
4  
5 quality ratings and for transparency with their derivation.  
6  
7  
8  
9

### 10 **Strengths and Weaknesses**

11  
12 We included a diverse range of participants in terms of country, sex, and age, but not  
13  
14 ethnicity. We were satisfied that our sample size was appropriate in terms of answering our  
15  
16 research questions relating to the conceptualisation of quality and its measurement.[22] One  
17  
18 experienced health service researcher, who was also a pharmacist (MW), undertook all data  
19  
20 collection. She did not disclose her pharmacist background unless specifically asked. The  
21  
22 breadth and depth of topics covered suggests that participants felt empowered to participate  
23  
24 and share positive and negative experiences of community pharmacy use. Data analysis was  
25  
26 undertaken by two experienced qualitative researchers (KS, female and RW, male) neither of  
27  
28 whom were pharmacists. This ensured a balanced approach to the analysis and  
29  
30 interpretation of the data. Our interpretive analysis explored participants' understanding and  
31  
32 sense-making of their experiences of pharmacy services. We are confident that all key  
33  
34 recurring themes were identified with no new themes emerging in the later interviews or  
35  
36 focus groups.  
37  
38  
39  
40  
41  
42  
43  
44  
45  
46

### 47 **Important Differences in the results**

48  
49 None of the major themes derived from our study are reflected in the national quality  
50  
51 indicators. This is perhaps unsurprising given that there was no patient and public  
52  
53 involvement (PPI) with indicator development. To date, there has been minimal PPI in the  
54  
55 development of the few existing quality indicators for community pharmacy  
56  
57 services.[23,24,25] There has, however, been limited exploration of the likely influence of  
58  
59  
60

1  
2  
3 quality ratings on patient behaviour. Our participants anticipated that quality indicators  
4  
5 would have little effect on their use of pharmacies, reflecting the results of two US studies  
6  
7 that concurred that patients would only consider indicators if they were seeking a community  
8  
9 pharmacy in a new area[26,27].  
10  
11  
12  
13  
14

### 15 **Meaning of the study**

16  
17 Our results show that the public value relational aspects of care i.e. personnel who are  
18  
19 friendly and approachable, and reflect a recent UK-wide survey of over 1000 members of the  
20  
21 public and their preferences for attributes of community pharmacies when seeking care for  
22  
23 minor ailments (aka self-care consultations).[28] As with these survey respondents, our  
24  
25 participants also prioritised ease of access and convenience as important attributes.  
26  
27  
28  
29  
30  
31

### 32 **Implications for clinicians and policymakers; and unanswered questions and future** 33 **research.**

34  
35 Future quality indicators should involve stakeholders, particularly patients and public, as the  
36  
37 main users of community pharmacy. Despite a possible lack of effect on care-seeking  
38  
39 behaviour, the use of co-produced indicators *could* be used to drive quality improvement  
40  
41 within and between community pharmacies.  
42  
43  
44  
45  
46  
47  
48  
49

### 50 **CONCLUSION**

51  
52 The public conceptualise quality of community pharmacy services as multidimensional and  
53  
54 they value relational aspects of care provided by personnel in this setting. Whilst the  
55  
56 development and application of quality indicators may drive improvement, it seems unlikely  
57  
58 that they would influence the public's use of individual pharmacies.  
59  
60



## ACKNOWLEDGEMENTS

We thank all the members of the public who participated in interviews and focus groups as well as the organisations and individuals who facilitated recruitment of participants for this study.

## FUNDING

This work was supported by the Health Foundation with Professor Watson's Improvement Science Fellowship.

## COMPETING INTERESTS

None declared.

## AUTHOR CONTRIBUTIONS

MW led the scientific development and interpretation of the study, conducted most of the data collection, and led manuscript production and revisions.

KS advised on and developed analytical tools and frameworks, and contributed towards data analysis and interpretation, manuscript production and revisions.

RW contributed towards data analysis and interpretation, manuscript production and revisions.

## DATA SHARING

No additional data are available. All data related to this study are included in this submission, either in tables in the manuscript or in supplementary files.

1  
2  
3  
4  
5  
6  
7  
8  
9  
10  
11  
12  
13  
14  
15  
16  
17  
18  
19  
20  
21  
22  
23  
24  
25  
26  
27  
28  
29  
30  
31  
32  
33  
34  
35  
36  
37  
38  
39  
40  
41  
42  
43  
44  
45  
46  
47  
48  
49  
50  
51  
52  
53  
54  
55  
56  
57  
58  
59  
60

For peer review only

## References

- 1 Fielding S, Porteous T, Ferguson J, *et al.* The burden of minor ailment consultations in general practice and emergency departments. *Fam Pract* 2015;32:165-172. doi: 10.1093/fampra/cmz003
- 2 Watson MC, Ferguson J, Barton GR, *et al.* A comparison of health- and cost-related outcomes for patients presenting with similar symptoms in community pharmacies, general practices and emergency departments: A cohort study. *BMJ Open* 2015;5:e006261 doi:10.1136/bmjopen-2014-006261
- 3 NHS Digital (National Statistics). General Pharmaceutical Services in England 2007/2008 to 2016/2017 <https://digital.nhs.uk/data-and-information/publications/statistical/general-pharmaceutical-services/general-pharmaceutical-services-england-2007-08-to-2016-17#key-facts>. Accessed 23/07/18
- 4 Worldometer: UK Population (live). <http://www.worldometers.info/world-population/uk-population>. Accessed 23/07/18
- 5 Todd A, Copeland A, Husband A, *et al.* The positive pharmacy care law: an area-level analysis of the relationship between community pharmacy distribution, urbanity and social deprivation in England. *BMJ Open* 2014;4:e005764. doi:10.1136/bmjopen-2014-005764

1  
2  
3  
4 6 NHS England. Transforming urgent and emergency care services in England. Urgent and  
5  
6 emergency care review end of phase 1 report. Appendix 1—Revised evidence base from the  
7  
8 urgent and emergency care review. The Urgent and Emergency Care Review. NHS, London;  
9  
10 2013.  
11  
12

13  
14  
15  
16 7 NHS Choices: NHS services explained.

17  
18  
19 <https://www.nhs.uk/NHSEngland/AboutNHSservices/Pages/NHSServices.aspx>

20  
21 Accessed 23/07/18  
22  
23

24  
25  
26 8 NHS Scotland: Know who to turn to. <http://knowwhototurnto.org> Accessed 23/07/18  
27  
28

29  
30 9 Pearl J. Are some pharmacies failing? WHICH? 2013(June 2013):26  
31  
32

33  
34  
35  
36 10 Studman A. Three in 10 pharmacies not following safety guidelines, finds Which?

37  
38 investigation. Which? 2018 (February): <https://www.which.co.uk/news/2018/02/three-in->

39  
40 [10-pharmacies-not-following-safety-guidelines-finds-which-investigation](https://www.which.co.uk/news/2018/02/three-in-10-pharmacies-not-following-safety-guidelines-finds-which-investigation) Accessed 23/07/18  
41  
42

43  
44  
45 11 Inch J, Porteous T, Maskrey V, *et al*. It's not what you do it's the way that it's measured:

46  
47 Quality assessment of minor ailment management in community pharmacies. *Int J Pharm*

48  
49 *Pract*. 2016: DOI: 10.1111/ijpp.12305  
50  
51  
52  
53  
54  
55  
56  
57  
58  
59  
60

1  
2  
3  
4 12 NHS England. Pharmacy Quality Payments: Quality Criteria Guidance. 2017.

5  
6 <https://www.england.nhs.uk/wp-content/uploads/2017/02/quality-payments-quality->  
7  
8 [criteria-guidance-1.pdf](https://www.england.nhs.uk/wp-content/uploads/2017/02/quality-payments-quality-criteria-guidance-1.pdf) Accessed 23/07/18

9  
10  
11  
12  
13  
14 13 Watson MC, Skea Z. Jugglers and tightrope walkers: The challenge of delivering quality  
15  
16 community pharmacy services. *PLoS ONE* 13(7): e0200610.

17  
18  
19 doi:10.1371/journal.pone.0200610

20  
21  
22  
23  
24 14 Health and Social Care Alliance Scotland. <https://www.alliance-scotland.org.uk/>

25  
26 Accessed 23/07/18

27  
28  
29  
30  
31 15 Bowling A. *Research Methods in Health Care*. Open University Press, Buckingham. 2002

32  
33  
34  
35  
36 16 Bowie P, McNab D, Ferguson J, *et al*. Quality improvement and person-centredness: A  
37  
38 participatory mixed methods study to develop the 'always event' concept for primary care.

39  
40  
41 *BMJ Open* 2015;5:e006667. doi: 10.1136/bmjopen-2014-006667doi: 10.1136/bmjopen-  
42  
43 2014-006667

44  
45  
46  
47  
48 17 Institute for Healthcare Improvement: Always Events Toolkit.

49  
50 <http://www.ihl.org/resources/Pages/Tools/Always-Events-Toolkit.aspx> Accessed 23/07/18

51  
52  
53  
54  
55 18 Attride-Stirling J. Thematic networks: an analytic tool for qualitative research. *Qualitative*  
56  
57 *research*. 2001;1(3):385-405

- 
- 1  
2  
3  
4  
5  
6  
7 19 Braun V, Clarke V. Using thematic analysis in psychology. *Qualitative research in*  
8  
9 *psychology*. 2006;3(2):77-101  
10  
11  
12  
13  
14 20 Ritchie J, Spencer L, O'Connor W. Carrying out qualitative analysis. *Qualitative research*  
15  
16 *practice: A guide for social science students and researchers*. 2003;1  
17  
18  
19  
20  
21 21 Tong A, Sainsbury P, Craig J. Consolidated criteria for reporting qualitative research  
22  
23 (COREQ): A 32-item checklist for interviews and focus groups. *Int J Qual Health Care*.  
24  
25 2007;19(6):349–357. pmid:17872937  
26  
27  
28  
29  
30 22 Marshall MN. Sampling for qualitative research. *Fam Pract* 1996;13:522-25  
31  
32  
33  
34 23 Halsall D, Noyce PR, Ashcroft DM. Characterizing healthcare quality in the community  
35  
36 pharmacy setting: Insights from a focus group study. *Res Soc Admin Pharm*. 2012;8(5):360-  
37  
38 370  
39  
40  
41  
42  
43  
44 24 Grey E, Harris M, Rodham K, Weiss MC. Characteristics of good quality pharmaceutical  
45  
46 services common to community pharmacies and dispensing general practices. *Int J Pharm*  
47  
48 *Pract*. 2016;24(5):311-318  
49  
50  
51  
52  
53  
54 25 Blalock SJ, Keller S, Nau D, et al. Development of the consumer assessment of pharmacy  
55  
56 services survey. *J Am Pharm Assoc* 201;52:324-332.  
57  
58  
59  
60

1  
2  
3  
4 26 Shiyabola OO, Mort JR. Patients' perceived value of pharmacy quality measures: A  
5  
6 mixed-methods study. *BMJ Open*. 2015;5(1). doi: 10.1136/bmjopen-2014-006086  
7  
8  
9

10  
11 27 Warholak TL, Patel M, Rosenthal M, West-Strum D, Ettienne EB, Nunlee-Bland G, et al.  
12  
13 Patient perceptions of a pharmacy star rating model *J Am Pharm Assoc* (2003). 2017 May -  
14  
15 Jun;57(3):311-317. doi: 10.1016/j.japh.2017.01.011.  
16  
17  
18  
19

20  
21  
22  
23 28 Porteous T, Ryan M, Bond C, *et al*. Managing Minor Ailments; The Public's Preferences  
24  
25 for Attributes of Community Pharmacies. A Discrete Choice Experiment. *PLoS ONE* 11(3):  
26  
27 e0152257. Doi:10.1371/journal.pone.0152257  
28  
29  
30  
31  
32  
33  
34  
35  
36  
37  
38  
39  
40  
41  
42  
43  
44  
45  
46  
47  
48  
49  
50  
51  
52  
53  
54  
55  
56  
57  
58  
59  
60

**Manuscript:** How does the public conceptualise the quality of care and its measurement in community pharmacies in the United Kingdom?: A qualitative interview study

### Consolidated criteria for reporting qualitative studies (COREQ): 32-item checklist

Developed from:

Tong A, Sainsbury P, Craig J. Consolidated criteria for reporting qualitative research (COREQ): a 32-item checklist for interviews and focus groups. *International Journal for Quality in Health Care*. 2007. Volume 19, Number 6: pp. 349 – 357

| No. Item                                       | Guide questions/description                                                                              |                                                                                                                                                  | Reported on Page # |
|------------------------------------------------|----------------------------------------------------------------------------------------------------------|--------------------------------------------------------------------------------------------------------------------------------------------------|--------------------|
| <b>Domain 1: Research team and reflexivity</b> |                                                                                                          |                                                                                                                                                  |                    |
| <i>Personal Characteristics</i>                |                                                                                                          |                                                                                                                                                  |                    |
| 1. Interviewer/facilitator                     | Which author/s conducted the interview or focus group?                                                   | MW                                                                                                                                               | 4,6,19             |
| 2. Credentials                                 | What were the researcher's credentials?<br>E.g. PhD, MD                                                  | PhD                                                                                                                                              | 1                  |
| 3. Occupation                                  | What was their occupation at the time of the study?                                                      | Professor,<br>Department of<br>Pharmacy and<br>Pharmacology                                                                                      | 1                  |
| 4. Gender                                      | Was the researcher male or female?                                                                       | Female                                                                                                                                           | 6                  |
| 5. Experience and training                     | What experience or training did the researcher have?                                                     | Over 20 years' experience of health services research.                                                                                           | 6                  |
| <i>Relationship with participants</i>          |                                                                                                          |                                                                                                                                                  |                    |
| 6. Relationship established                    | Was a relationship established prior to study commencement?                                              | No                                                                                                                                               | -                  |
| 7. Participant knowledge of the interviewer    | What did the participants know about the researcher? e.g. personal goals, reasons for doing the research | Participants were briefed on the purpose of the study and understood that it was a research project being undertaken by MW. Ethical approval had | 6,7                |



|                                          |                                                                                                                                                          |                                                                                                                                                                                                  |     |
|------------------------------------------|----------------------------------------------------------------------------------------------------------------------------------------------------------|--------------------------------------------------------------------------------------------------------------------------------------------------------------------------------------------------|-----|
|                                          |                                                                                                                                                          | been granted, participants reviewed the participant information documentation prior to giving their written informed consent.                                                                    |     |
| 8. Interviewer characteristics           | What characteristics were reported about the interviewer/facilitator? e.g. Bias, assumptions, reasons and interests in the research topic                | MW is a registered pharmacist, which was a potential source of bias. However, MW did not disclose her background unless specifically asked. No other interviewer-related biases were identified. | 19  |
| <b>Domain 2: study design</b>            |                                                                                                                                                          |                                                                                                                                                                                                  |     |
| <i>Theoretical framework</i>             |                                                                                                                                                          |                                                                                                                                                                                                  |     |
| 9. Methodological orientation and Theory | What methodological orientation was stated to underpin the study? e.g. grounded theory, discourse analysis, ethnography, phenomenology, content analysis | Open coding with thematic analysis followed by a framework approach to support the systematic analysis of data around the research questions.                                                    | 7-8 |
| <i>Participant selection</i>             |                                                                                                                                                          |                                                                                                                                                                                                  |     |
| 10. Sampling                             | How were participants selected? e.g. purposive, convenience, consecutive, snowball                                                                       | Recruited via email using existing research networks, community groups, and personal networks. A maximum variation sample was recruited using a combination of purposive,                        | 6   |

|                                  |                                                                                   |                                                                                                                                                                                                                 |                 |
|----------------------------------|-----------------------------------------------------------------------------------|-----------------------------------------------------------------------------------------------------------------------------------------------------------------------------------------------------------------|-----------------|
|                                  |                                                                                   | convenience, and snowballing techniques.                                                                                                                                                                        |                 |
| 11. Method of approach           | How were participants approached? e.g. face-to-face, telephone, mail, email       | Email                                                                                                                                                                                                           | 6               |
| 12. Sample size                  | How many participants were in the study?                                          | 20                                                                                                                                                                                                              | 9               |
| 13. Non-participation            | How many people refused to participate or dropped out? Reasons?                   | No participants who agreed to take part in the study subsequently refused to participate, withdrew their consent, or dropped out.                                                                               | -               |
| <i>Setting</i>                   |                                                                                   |                                                                                                                                                                                                                 |                 |
| 14. Setting of data collection   | Where was the data collected? e.g. home, clinic, workplace                        | Data were collected via telephone or face-to-face in a non-clinical setting.                                                                                                                                    | 6               |
| 15. Presence of non-participants | Was anyone else present besides the participants and researchers?                 | No.                                                                                                                                                                                                             | 6               |
| 16. Description of sample        | What are the important characteristics of the sample? e.g. demographic data, date | Age range 20-79; 5 males, 15 females. Data was collected between August 2016 and July 2017.                                                                                                                     | 6, 10 (Table 1) |
| <i>Data collection</i>           |                                                                                   |                                                                                                                                                                                                                 |                 |
| 17. Interview guide              | Were questions, prompts, guides provided by the authors? Was it pilot tested?     | Interviews / focus groups were semi-structured using a topic guide. It was not piloted, but was modified throughout the data collection process to incorporate relevant topics identified in earlier interviews | 6-7             |

|                                        |                                                                          |                                                                                                                        |     |
|----------------------------------------|--------------------------------------------------------------------------|------------------------------------------------------------------------------------------------------------------------|-----|
|                                        |                                                                          | and focus groups.                                                                                                      |     |
| 18. Repeat interviews                  | Were repeat interviews carried out? If yes, how many?                    | No                                                                                                                     | -   |
| 19. Audio/visual recording             | Did the research use audio or visual recording to collect the data?      | Yes. Interviews / focus groups were recorded using an audio recorder.                                                  | 6   |
| 20. Field notes                        | Were field notes made during and/or after the interview or focus group?  | No additional notes were made.                                                                                         | -   |
| 21. Duration                           | What was the duration of the interviews or focus group?                  | The semi-structured interviews / focus groups lasted an average of 51 minutes (range 31 to 74 minutes).                | 6   |
| 22. Data saturation                    | Was data saturation discussed?                                           | Yes. Recruitment ceased once theoretical saturation was reached (i.e. when no new themes were emerging from the data). | 6   |
| 23. Transcripts returned               | Were transcripts returned to participants for comment and/or correction? | No.                                                                                                                    | -   |
| <b>Domain 3: analysis and findings</b> |                                                                          |                                                                                                                        |     |
| <i>Data analysis</i>                   |                                                                          |                                                                                                                        |     |
| 24. Number of data coders              | How many data coders coded the data?                                     | Two.                                                                                                                   | 7,8 |
| 25. Description of the coding tree     | Did authors provide a description of the coding tree?                    | Coding described in methods section.                                                                                   | 7-8 |
| 26. Derivation of themes               | Were themes identified in advance or derived from the data?              | Themes were derived from the data.                                                                                     | 7-8 |
| 27. Software                           | What software, if applicable, was used to manage the data?               | Nvivo.                                                                                                                 | 7-8 |

|                                  |                                                                                                                                 |                                                                                               |       |
|----------------------------------|---------------------------------------------------------------------------------------------------------------------------------|-----------------------------------------------------------------------------------------------|-------|
| 28. Participant checking         | Did participants provide feedback on the findings?                                                                              | No.                                                                                           | -     |
| <i>Reporting</i>                 |                                                                                                                                 |                                                                                               |       |
| 29. Quotations presented         | Were participant quotations presented to illustrate the themes/findings? Was each quotation identified? e.g. participant number | Yes, themes/findings were supported with direct quotes attributed to anonymised participants. | 10-18 |
| 30. Data and findings consistent | Was there consistency between the data presented and the findings?                                                              | Yes.                                                                                          | 10-18 |
| 31. Clarity of major themes      | Were major themes clearly presented in the findings?                                                                            | Yes.                                                                                          | 10-18 |
| 32. Clarity of minor themes      | Is there a description of diverse cases or discussion of minor themes?                                                          | No.                                                                                           | N/A   |
